# Supplementary material for: Asymmetric Conservation within Pairs of Co-occurred Motifs Mediates Weak Direct Binding of Transcription Factors in ChIP-seq Data
Source: Preprints.org preprint supplement (doi:10.20944/preprints202007.0639.v2), 2020-08-20
Supplement: Supplementary file 3 [file Supplenebtary_Tables.xlsx]

## Sheet: Table_S1
Table S1. The description of human/mouse ChIP-seq datasets used in analysis. Table presents for each ChIP-seq dataset TF name, GEO or PMID ID, cell line, treatment and tissue. Also, we provide some details from output data of the Homer de novo motif search [8]: the fractions of peaks and background sequences that contained an anchor motif (thresholds of matrices here were taken from Homer tool [8…
#Dataset	#TF	Gene ID	(GEO acession and replicate) or (PMID)	Cell line	Treatement	Karyotype	Tissue	De novo motif search, % of targets	De novo motif search, % of background	No. of peaks	Mean peak length	Anchor motif length
1	1	AR	GSM686917	LNCaP prostate cancer cells	DHT, 1h	cancer	prostate	0.475	0.0602	3156	122	12
2	1	AR	GSM759657_R1	LNCaP-1F5 epithelial cells derived from metastatic prostate carcinoma	DHT, 2h	cancer	prostate	0.5409	0.1947	14053	497	12
3	1	AR	GSM759658_R2	LNCaP-1F5 epithelial cells derived from metastatic prostate carcinoma	DHT, 2h	cancer	prostate	0.4794	0.1566	15667	433	12
4	2	ATF3	GSM1010789_R1	A549	0.02% Ethanol, 1h	cancer	lung epithelium	0.3624	0.0604	7467	690	12
5	2	ATF3	GSM1010789_R2	A549	0.02% Ethanol, 1h	cancer	lung epithelium	0.224	0.0409	8416	733	12
6	3	CEBPB	GSM785496	Blood monocytes		normal, adult	pancreas	0.7697	0.0833	13693	158	10
7	4	CEBPα	GSM1020364	adipocyte SGBS cell line undergoing differentiation for 10 days		normal, adult SGBS (inherited desease)	fat	0.7027	0.0853	6317	193	10
8	5	CREB1	GSM1010719_R1	A549	1 h with 100 nM Dexamethasone	cancer	lung epithelium	0.1282	0.0116	5655	930	10
9	5	CREB1	GSM1010719_R2	A549	1 h with 100 nM Dexamethasone	cancer	lung epithelium	0.1789	0.0257	10802	377	12
10	5	CREB1	GSM1010760	GM12878		normal, adult	blood, B-lymphocyte	0.2245	0.0212	3292	1056	10
11	5	CREB1	GSM1010808_R2	HepG2		cancer	liver	0.168	0.014	5320	895	12
12	5	CREB1	GSM1010857	ECC-1, endometrium adenocarcinoma		cancer	uterus	0.1537	0.0071	10070	586	12
13	5	CREB1	GSM1010890_R1	K562		cancer	blood	0.1537	0.0147	6891	828	10
14	5	CREB1	GSM1010890_R2	K562		cancer	blood	0.1727	0.0151	5453	962	12
15	5	CREB1	GSM1010896_R1	H1-hESC		normal, embryonic	embryonic stem cell	0.2015	0.0073	2918	814	12
16	5	CREB1	GSM1239450	LoVo, colon adenocarcinoma		cancer	colon	0.0642	0.0039	4703	500	10
17	5	CREB1	GSM1538431	LNCaP		cancer	prostate	0.0869	0.0088	21991	691	12
18	6	CTCF	GSM325897	HeLa		cancer	cervix	0.633	0.0212	19308	236	12
19	7	ESR1	GSM1010823_R1	T-47D	1 h with 100 nM Bisphenol A	cancer	epithelial cell line derived from a mammary ductal carcinoma	0.2525	0.0143	2768	399	12
20	7	ESR1	GSM1010823_R2	T-47D	1 h with 100 nM Bisphenol A	cancer	epithelial cell line derived from a mammary ductal carcinoma	0.3664	0.0265	3207	503	12
21	7	ESR1	GSM803374_R1	T-47D	1 h with 100 nM Genistein (Myers)	cancer	epithelial cell line derived from a mammary ductal carcinoma	0.3452	0.0413	7756	471	12
22	7	ESR1	GSM803374_R2	T-47D	1 h with 100 nM Genistein (Myers)	cancer	epithelial cell line derived from a mammary ductal carcinoma	0.3249	0.0347	5187	459	12
23	8	ETS1	GSE96224	Induced pluripotent stem cell		normal	skin	0.513	0.1358	9949	363	12
24	8	ETS1	GSM1010829	A549	0.02% Ethanol, 1h	cancer	lung epithelium	0.3751	0.0875	4148	541	12
25	8	ETS1	GSM449525	Jurkat, clone E6-1 T lymphocyte		cancer	blood	0.5752	0.1694	4998	899	12
26	8	ETS1	GSM738821	RWPE-1		immortalized transformed	prostate	0.5307	0.2075	2180	480	8
27	8	ETS1	GSM803442_R2	K562		cancer	blood	0.5465	0.2214	13722	437	10
28	8	ETS1	GSM803510	GM12878, B lymphocytes, lymphoblastoid		normal	blood	0.6056	0.1031	7543	541	12
29	9	FOS	GSM935355	K562		cancer	blood	0.3643	0.0187	4389	493	12
30	10	FOXA1	GSE30623	LNCaP-1F5 epithelial cells derived from metastatic prostate carcinoma	DHT, 2h	cancer	prostate	0.7888	0.1007	5000	284	12
31	10	FOXA1	GSM1505633	HUES64		normal, embryonic	embryonic stem cell	0.7126	0.085	11733	243	12
32	10	FOXA1	GSM1505635	HUES64, dEN endoderm		normal, embryonic	embryonic stem cell	0.4792	0.0519	12910	230	10
33	10	FOXA1	GSM686926	LNCaP prostate cancer cells	DHT, 1h	cancer	prostate	0.7872	0.0879	5000	228	12
34	11	FOXA2	Walermann et al., PMID 19822575, suppl. Data	HepG2 cells		cancer	liver	0.6675	0.0707	4367	426	12
35	12	FOXO1	GSM1668936	germinal center B cells from tonsil tissues		normal, adult	tonsils	0.4802	0.1318	5749	223	10
36	13	GATA1	GSM1816080	Fetal hematopoietic stem/progenitor cells, primary fetal liver CD34+		normal, embryonic	embryonic stem cell	0.3006	0.0632	5000	191	10
37	14	GATA4	GSM1505642	HUES64		normal, embryonic	embryonic stem cell	0.3294	0.0437	8733	186	10
38	14	GATA4	GSM2279955	iPS-derived cardiomyocytes		normal, adult	heart/cardiac muscle	0.7114	0.1895	4370	286	8
39	14	GATA4	GSM2279964	iPS-derived cardiomyocytes		normal, adult	heart/cardiac muscle	0.4398	0.0871	8559	380	10
40	14	GATA4	GSM2279972	iPS-derived cardiomyocytes		normal, adult	heart/cardiac muscle	0.571	0.1152	6757	280	12
41	14	GATA4	GSM2280004	iPS-derived cardiomyocytes		normal, adult	heart/cardiac muscle	0.5809	0.1386	5133	476	12
42	15	HNF4α	GSM935619	HepG2	forskolin	cancer	liver	0.7029	0.0904	6597	646	12
43	16	JUN	GSM935411	K562	no treatment	cancer	blood	0.6754	0.0312	6475	511	10
44	16	JUN	GSM935467	K562	IFNg 6h	cancer	blood	0.7325	0.0297	2052	520	10
45	16	JUN	GSM935468	K562	IFNa 6h	cancer	blood	0.7335	0.0286	1707	510	12
46	16	JUN	GSM935602	K562	IFNa 30m	cancer	blood	0.6996	0.0307	3432	546	10
47	17	JUNB	GSE96382	K562		cancer	blood	0.5237	0.0202	3248	365	12
48	18	KLF1	GSM2026804	HEK293		normal, embryonic	kidney	0.6754	0.1982	5146	495	12
49	19	KLF5	GSM1250891	YCC3 gastric cancer		cancer	stomach	0.4174	0.0791	1531	999	10
50	20	MAX	GSM935539	K562		cancer	blood	0.8321	0.1641	1918	649	10
51	21	MEF2A	GSM1010834_R1	SK-N-SH		cancer	brain	0.3852	0.0868	6109	753	12
52	21	MEF2A	GSM1010834_R2	SK-N-SH		cancer	brain	0.5401	0.1359	2294	781	12
53	21	MEF2A	GSM803379_R2	K562		cancer	blood	0.3926	0.0189	2229	400	12
54	21	MEF2A	GSM803511_R2	GM12878		normal, adult	blood, B-lymphocyte	0.4615	0.1154	10247	596	12
55	22	MYC	GSM935320	HeLa-S3		cancer	cevix	0.3171	0.0473	7440	868	8
56	22	MYC	GSM935466	K562	IFNa 6h	cancer	blood	0.4963	0.1609	3385	956	10
57	23	MYOD1	GSM1218849_CANCER	RD (rhabdomyosarcoma) cells		cancer	muscle	0.7224	0.0703	25229	489	8
58	23	MYOD1	GSM1218849_NORMAL	human myoblasts		normal, adult	muscle	0.8064	0.0917	11776	491	8
59	24	NANOG	GSM803437	H1-hESC		cancer	embryonic stem cell	0.4675	0.1076	4723	310	10
60	25	NR3C1	GSM1176698_R1	HEK293	dexamethasone, stably expressing wt GR	normal, embryonic	kidney	0.6806	0.1837	3601	500	12
61	25	NR3C1	GSM1176699_R2	HEK293	dexamethasone, stably expressing wt GR	normal, embryonic	kidney	0.4786	0.0722	2340	500	12
62	25	NR3C1	GSM1176700_R1	HEK293	dexamethasone, stably expressing SUMOylation-defective GR	normal, embryonic	kidney	0.6251	0.0988	9326	500	12
63	25	NR3C1	GSM1176701_R2	HEK293	dexamethasone, stably expressing SUMOylation-defective GR	normal, embryonic	kidney	0.5461	0.073	4298	500	12
64	25	NR3C1	GSM759669	LNCaP-1F5	100 nM DEX	cancer	prostate	0.7667	0.3269	8961	576	12
65	25	NR3C1	GSM980655	LNCaP-1F5	100 nM DEX	cancer	prostate	0.4608	0.0593	4297	500	12
66	26	POU2F1	GSM2058883	LNCaP prostate cancer cells	DHT 10 nM	cancer	prostate	0.0593	0.0076	6917	279	10
67	27	POU5F1	GSE36134	NCCIT (testicular embryonic carcinoma)	SNF5 overexpression	cancer	anterior mediastinal mixed germ cell tumor	0.3821	0.048	5615	500	12
68	27	POU5F1	GSM518373	hESC h1		normal, embryonic	embryonic stem cell	0.2404	0.0095	5000	100	12
69	27	POU5F1	GSM803438_R1	hESC h1		normal, embryonic	embryonic stem cell	0.4429	0.02	3190	454	12
70	27	POU5F1	GSM803438_R2	hESC h1		normal, embryonic	embryonic stem cell	0.4604	0.0141	1705	352	12
71	28	PPARG	GSE25836	adipocyte cell-line (SGBS)		normal, adult SGBS (inherited desease)	fat	0.5592	0.1768	21279	332	12
72	29	RELA	GSE63736	L1236 Hodgkin lymphoma cell line		cancer	blood	0.5732	0.0689	492	1533	10
73	29	RELA	GSM1008531	HeLa, cervical cancer cell line	TNFa	cancer	cervix	0.4729	0.0367	1271	500	12
74	29	RELA	GSM1008532	HeLa, cervical cancer cell line	TNFa	cancer	cervix	0.5158	0.057	853	499	10
75	29	RELA	GSM2103048	Beas-2B (epithelial virus transformed)	dexamethasone + TNF	normal, adult	bronchial epithelium	0.3862	0.0675	8333	501	12
76	30	RUNX1	GSE96253	K562		cancer	blood	0.1289	0.0322	4034	315	8
77	30	RUNX1	GSM1045363	Jurkat Trex (Invitrogen)		cancer	blood	0.7404	0.1307	3320	854	10
78	30	RUNX1	GSM1082306	Kasumi-1 cells		cancer	blood	0.3805	0.1142	15591	308	10
79	30	RUNX1	GSM449526	Jurkat, clone E6-1 T lymphocyte		cancer	blood	0.4502	0.1455	3632	341	10
80	31	RXRA	GSM803452_R2	HepG2 cells		cancer	liver	0.5527	0.1548	9934	554	10
81	31	RXRA	GSM803506_R1	hESC h1		normal, embryonic	embryonic stem cell	0.5375	0.1387	746	463	10
82	31	RXRA	GSM803506_R2	hESC h1		normal, embryonic	embryonic stem cell	0.4809	0.1791	2776	335	8
83	32	SMAD3	GSM727585	H9		normal, embryonic	embryonic stem cell	0.5666	0.2018	2296	191	12
84	33	SMAD4	GSM727586	H9		normal, embryonic	embryonic stem cell	0.4751	0.1053	4531	212	10
85	34	SOX2	GSM1139032	KYSE70		cancer	esophagus	0.475	0.2016	8478	601	8
86	34	SOX2	GSM1139038	HCC95		cancer	lung	0.7698	0.3757	5360	601	8
87	34	SOX2	GSM1139041	hESC H9 cells		normal, embryonic	embryonic stem cell	0.6965	0.2334	5706	601	10
88	34	SOX2	GSM1505765	HUES64 (embryonic stem cells), differentiated to entoderm		normal, embryonic	embryonic stem cell	0.2367	0.0594	5597	91	10
89	34	SOX2	GSM1505766	HUES64 (embryonic stem cells)		normal, embryonic	embryonic stem cell	0.3718	0.0354	10624	270	10
90	34	SOX2	GSM1505767	HUES64 (embryonic stem cells), differentiation towards mesendoderm		normal, embryonic	embryonic stem cell	0.4149	0.0291	5103	164	10
91	35	SP1	GSE92217_R1	K562		cancer	blood	0.3953	0.0398	12163	428	12
92	35	SP1	GSM1505769	HUES64 (embryonic stem cells)		normal, embryonic	embryonic stem cell	0.3745	0.0231	7700	109	12
93	35	SP1	GSM1505770	HUES64 (embryonic stem cells), differentiated to endoderm		normal, embryonic	embryonic stem cell	0.4522	0.0678	10809	494	12
94	35	SP1	GSM2026753	HEK293 (embryonic kidney)		transformed (adenovirus), embryonic	kidney	0.5859	0.2213	5558	500	12
95	35	SP1	GSM803505_R1	K562		cancer	blood	0.3721	0.0533	1954	481	12
96	36	SPI1	GSM1370280	OCI-LY10, diffuse large B-cell lymphoma (DLBCL)		cancer	blood	0.6756	0.0317	11728	201	12
97	36	SPI1	GSM1940194_R1	K562	0.01% DMSO vehicle	cancer	blood	0.6813	0.019	4406	174	12
98	36	SPI1	GSM1940195_R2	K562	0.01% DMSO vehicle	cancer	blood	0.5437	0.0254	8604	177	12
99	36	SPI1	GSM1940196_R3	K562	0.01% DMSO vehicle	cancer	blood	0.466	0.0062	3466	173	12
100	37	SRF	GSM803520_R1	K562		cancer	blood	0.1694	0.0039	5453	352	12
101	37	SRF	GSM803520_R2	K562		cancer	blood	0.2964	0.0034	2028	259	12
102	38	STAT1	GSM935488	K562	IFNa 6h	cancer	blood	0.7454	0.0281	699	679	12
103	39	TFAP4	GSE95920	HepG2		cancer	liver	0.6562	0.0915	15484	314	10
104	39	TFAP4	GSM714610	LNCaP prostate cancer cells		cancer	prostate	0.4681	0.0776	6082	290	10
105	40	TP53	GSE55727	fibroblast lines GM00011 and GM06170	0.2 ug/ml doxorubicin 12 h	normal, adult	connective tissue, skin	0.5716	0.0377	2638	759	12
106	40	TP53	GSM1348339	BJ, foreskin fibroblasts		normal, adult	foreskin fibroblasts	0.6177	0.0079	361	306	12
107	40	TP53	GSM1366689_R1	Human neonatal foreskin keratinocytes	Cells were treated for 24hrs with 350nM Adrimycin or 25uM Cisplatin (это антибиотики и противоопухолевые препараты одновременно)	normal, neonatal	foreskin keratinocytes	0.4948	0.0291	4604	804	12
108	40	TP53	GSM1366695_R2	Human neonatal foreskin keratinocytes	Cells were treated for 24hrs with 350nM Adrimycin or 25uM Cisplatin (это антибиотики и противоопухолевые препараты одновременно)	normal, neonatal	foreskin keratinocytes	0.5174	0.0288	5839	685	12
109	40	TP53	GSM545807	U2OS (osteosarcoma)	Actinomycin D (5 nm)	cancer	bone	0.5185	0.0132	2131	348	12
110	40	TP53	GSM783262	IMR90, normal human lung fibroblasts	Cultures were treated with 375 Î¼M 5-fluorouracil (SIGMA) for 6 hrs	normal, adult	lung	0.3553	0.0094	743	530	12
111	41	TR	GSE105400	K562		cancer	blood	0.2823	0.0208	1757	362	8
112	42	USF1	GSM803426_R1	hESC h1		normal, embryonic	embryonic stem cell	0.659	0.0466	7500	476	10
113	42	USF1	GSM803426_R2	hESC h1		normal, embryonic	embryonic stem cell	0.7123	0.0511	7500	483	12
114	42	USF1	GSM803441_R1	K562		cancer	blood	0.6556	0.0391	5000	514	12
115	42	USF1	GSM803441_R2	K562		cancer	blood	0.7672	0.0597	5000	523	12
116	43	VDR	GSM934614	LX2 cells	100nM calcipotriol	immortalized	bone marrow-derived mesenchymal stem cells	0.4667	0.0454	1532	210	12
117	44	YY1	GSM803516_R1	GM12892		immortalized	blood	0.6357	0.258	26975	574	12
118	44	YY1	GSM803516_R2	GM12892		immortalized	blood	0.4925	0.0301	10228	406	12
119	45	ZNF341	GSE107719	Epstein-Barr virus (EBV) transformed lymphoblastic B cells		transformed, cancer	blood	0.3668	0.0338	1657	270	10

## Sheet: Table_S2
Table S2. Description od asymmetric CEs for benchmark data of 211 ChIP-seq datasets. Table presents for each partner motif from Hocomoco human core collection [14] the family and subfamily names according to classification [13], for Full, Partial, Overlap, Spacer and Any computation flows [11] the number of ChIP-seq datasets possessing (a) significant CEs without taking into account motifs conser…
Hocomoco		TF classification		Number of ChIP-seq datasets
				Arbtrary conservation of motifs					Conservative Anchor					Conservative Partner
TF name	Hocomoco ID	TF family	TF subfamily	Full overlap	Partial overlap	Overlap	Spacer	Any	Full overlap	Partial overlap	Overlap	Spacer	Any	Full overlap	Partial overlap	Overlap	Spacer	Any
AHR	AHR_HUMAN.H11MO.0.B	PAS domain factors{1.2.5}	Ahr-like factors{1.2.5.1}	21	42	56	0	4	9	0	14	0	2	15	0	38	0	0
AIRE	AIRE_HUMAN.H11MO.0.C	AIRE{5.3.1}	AIRE{5.3.1.0.1}	19	40	53	0	0	18	0	23	0	0	19	0	45	0	0
ALX1	ALX1_HUMAN.H11MO.0.B	Paired-related HD factors{3.1.3}	ALX{3.1.3.1}	7	36	40	0	2	7	0	5	0	0	7	0	32	0	0
AR	ANDR_HUMAN.H11MO.0.A	Steroid hormone receptors (NR3){2.1.1}	GR-like receptors (NR3C){2.1.1.1}	11	23	31	0	2	10	0	11	0	0	10	0	21	0	0
TFAP2A	AP2A_HUMAN.H11MO.0.A	AP-2{1.3.1}	AP-2alpha{1.3.1.0.1}	2	43	45	0	1	2	0	1	0	0	2	0	40	0	0
TFAP2B	AP2B_HUMAN.H11MO.0.B	AP-2{1.3.1}	AP-2beta{1.3.1.0.2}	3	28	29	2	4	3	0	2	0	2	3	2	28	0	0
TFAP2C	AP2C_HUMAN.H11MO.0.A	AP-2{1.3.1}	AP-2gamma{1.3.1.0.3}	4	38	38	0	2	2	0	2	0	1	2	0	38	0	0
ARID5B	ARI5B_HUMAN.H11MO.0.C	ARID-related factors{3.7.1}	ARID5{3.7.1.5}	10	35	37	1	2	10	0	7	0	1	10	0	29	0	0
ARNT	ARNT_HUMAN.H11MO.0.B	PAS domain factors{1.2.5}	Arnt-like factors{1.2.5.2}	19	30	38	0	8	10	0	13	0	7	16	7	29	0	0
ASCL1	ASCL1_HUMAN.H11MO.0.A	MyoD / ASC-related factors{1.2.2}	Achaete-Scute-like factors{1.2.2.2}	7	40	40	0	1	7	0	2	0	1	7	0	39	0	0
ATF1	ATF1_HUMAN.H11MO.0.B	CREB-related factors{1.1.7}	CREB-like factors{1.1.7.1}	5	34	36	0	1	1	0	1	0	0	1	0	31	0	0
ATF2	ATF2_HUMAN.H11MO.0.B	Jun-related factors{1.1.1}	ATF-2-like factors{1.1.1.3}	8	47	51	0	0	3	0	1	0	0	4	0	44	0	0
ATF3	ATF3_HUMAN.H11MO.0.A	Fos-related factors{1.1.2}	ATF-3-like factors{1.1.2.2}	6	27	30	4	6	4	0	2	2	2	4	0	23	0	0
ATF4	ATF4_HUMAN.H11MO.0.A	ATF-4-related factors{1.1.6}	ATF-4{1.1.6.0.1}	1	35	36	0	3	1	0	1	0	0	1	0	31	0	0
ATF6	ATF6A_HUMAN.H11MO.0.B	CREB-related factors{1.1.7}	ATF-6 factors{1.1.7.3}	3	23	23	0	2	3	0	3	0	0	3	0	22	0	0
ATOH1	ATOH1_HUMAN.H11MO.0.B	Tal-related factors{1.2.3}	Neurogenin / Atonal-like factors{1.2.3.4}	1	37	37	0	1	1	0	1	0	0	1	0	31	0	0
BACH1	BACH1_HUMAN.H11MO.0.A	Jun-related factors{1.1.1}	NF-E2-like factors{1.1.1.2}	5	31	34	1	3	1	0	1	1	2	1	2	30	0	0
BACH2	BACH2_HUMAN.H11MO.0.A	Jun-related factors{1.1.1}	NF-E2-like factors{1.1.1.2}	3	36	41	0	1	1	0	1	0	1	1	0	35	0	0
BATF	BATF_HUMAN.H11MO.0.A	B-ATF-related factors{1.1.4}	B-ATF{1.1.4.0.1}	20	38	52	0	3	15	0	24	0	1	20	1	46	0	0
BATF3	BATF3_HUMAN.H11MO.0.B	B-ATF-related factors{1.1.4}	B-ATF-3{1.1.4.0.3}	21	30	40	0	1	18	0	19	0	0	19	0	32	0	0
BCL11A	BC11A_HUMAN.H11MO.0.A	Factors with multiple dispersed zinc fingers{2.3.4}	BCL11{2.3.4.15}	7	27	35	1	3	6	0	9	0	1	6	1	31	0	0
BCL6	BCL6_HUMAN.H11MO.0.A	More than 3 adjacent zinc finger factors{2.3.3}	BCL6 factors{2.3.3.22}	1	41	43	0	2	1	0	0	0	0	1	1	43	0	0
BHLHA15	BHA15_HUMAN.H11MO.0.B	Tal-related factors{1.2.3}	Neurogenin / Atonal-like factors{1.2.3.4}	8	26	29	0	1	8	0	5	0	0	8	0	27	0	0
BHLHE40	BHE40_HUMAN.H11MO.0.A	Hairy-related factors{1.2.4}	Hairy-like factors{1.2.4.1}	8	27	34	0	2	6	0	5	0	1	8	0	27	0	0
ARNTL	BMAL1_HUMAN.H11MO.0.A	PAS domain factors{1.2.5}	Arnt-like factors{1.2.5.2}	1	37	38	0	3	1	0	1	0	1	1	0	32	0	0
T	BRAC_HUMAN.H11MO.0.A	Brachyury-related factors{6.5.1}	T (Brachyury){6.5.1.0.1}	31	54	71	1	2	23	0	40	1	0	30	0	61	0	0
CDX1	CDX1_HUMAN.H11MO.0.C	HOX-related factors{3.1.1}	CDX (Caudal type homeobox){3.1.1.9}	19	26	36	1	5	11	0	9	0	2	15	1	27	0	0
CDX2	CDX2_HUMAN.H11MO.0.A	HOX-related factors{3.1.1}	CDX (Caudal type homeobox){3.1.1.9}	5	38	40	0	1	5	0	4	0	0	5	0	33	0	0
CEBPA	CEBPA_HUMAN.H11MO.0.A	C/EBP-related{1.1.8}	C/EBP{1.1.8.1}	6	47	51	3	4	2	0	1	2	0	5	0	35	0	0
CEBPB	CEBPB_HUMAN.H11MO.0.A	C/EBP-related{1.1.8}	C/EBP{1.1.8.1}	4	38	40	1	4	2	0	0	1	0	3	1	31	0	0
CEBPD	CEBPD_HUMAN.H11MO.0.C	C/EBP-related{1.1.8}	C/EBP{1.1.8.1}	4	36	37	0	0	2	0	0	0	0	2	0	31	0	0
CEBPE	CEBPE_HUMAN.H11MO.0.A	C/EBP-related{1.1.8}	C/EBP{1.1.8.1}	4	40	41	0	0	2	0	2	0	0	4	0	38	0	0
CEBPG	CEBPG_HUMAN.H11MO.0.B	C/EBP-related{1.1.8}	C/EBP{1.1.8.1}	3	32	33	1	4	1	0	1	0	0	1	1	30	0	0
CLOCK	CLOCK_HUMAN.H11MO.0.C	PAS domain factors{1.2.5}	Arnt-like factors{1.2.5.2}	13	58	62	0	7	9	0	9	0	2	11	3	54	0	0
EBF1	COE1_HUMAN.H11MO.0.A	Early B-Cell Factor-related factors{6.1.5}	EBF1 (COE1){6.1.5.0.1}	7	49	53	0	0	4	0	5	0	0	6	0	49	0	0
NR2F1	COT1_HUMAN.H11MO.0.C	RXR-related receptors (NR2){2.1.3}	COUP-like receptors (NR2F){2.1.3.5}	19	37	40	0	1	15	0	13	0	0	17	2	36	0	0
NR2F2	COT2_HUMAN.H11MO.0.A	RXR-related receptors (NR2){2.1.3}	COUP-like receptors (NR2F){2.1.3.5}	6	36	42	2	6	3	0	4	0	1	6	1	35	0	0
CREB1	CREB1_HUMAN.H11MO.0.A	CREB-related factors{1.1.7}	CREB-like factors{1.1.7.1}	8	25	30	0	4	4	0	5	0	0	4	0	24	0	0
CREM	CREM_HUMAN.H11MO.0.C	CREB-related factors{1.1.7}	CREB-like factors{1.1.7.1}	4	46	48	0	2	2	0	0	0	0	2	0	38	0	0
CRX	CRX_HUMAN.H11MO.0.B	Paired-related HD factors{3.1.3}	OTX{3.1.3.17}	3	35	35	0	0	3	0	2	0	0	3	0	31	0	0
CTCF	CTCF_HUMAN.H11MO.0.A	More than 3 adjacent zinc finger factors{2.3.3}	CTCF-like factors{2.3.3.50}	21	44	50	0	5	18	0	26	0	2	20	4	41	0	0
CTCFL	CTCFL_HUMAN.H11MO.0.A	More than 3 adjacent zinc finger factors{2.3.3}	CTCF-like factors{2.3.3.50}	24	40	45	1	8	21	0	27	0	5	23	8	39	0	0
CUX1	CUX1_HUMAN.H11MO.0.C	HD-CUT factors{3.1.9}	CUX{3.1.9.2}	6	42	48	0	0	4	0	7	0	0	5	0	43	0	0
DBP	DBP_HUMAN.H11MO.0.B	C/EBP-related{1.1.8}	PAR factors{1.1.8.2}	1	33	33	0	0	1	0	1	0	0	1	0	25	0	0
DLX3	DLX3_HUMAN.H11MO.0.C	NK-related factors{3.1.2}	DLX{3.1.2.5}	2	19	22	0	0	1	0	0	0	0	1	0	12	0	0
DUX4	DUX4_HUMAN.H11MO.0.A	Paired-related HD factors{3.1.3}	DUX{3.1.3.7}	1	21	20	0	0	1	0	1	0	0	1	0	17	0	0
E2F1	E2F1_HUMAN.H11MO.0.A	E2F-related factors{3.3.2}	E2F{3.3.2.1}	4	26	26	0	6	4	0	4	0	4	4	4	26	0	0
E2F2	E2F2_HUMAN.H11MO.0.B	E2F-related factors{3.3.2}	E2F{3.3.2.1}	11	48	50	2	7	6	0	9	0	4	7	4	42	0	0
E2F3	E2F3_HUMAN.H11MO.0.A	E2F-related factors{3.3.2}	E2F{3.3.2.1}	4	32	33	1	5	4	0	3	0	1	4	3	26	0	0
E2F4	E2F4_HUMAN.H11MO.0.A	E2F-related factors{3.3.2}	E2F{3.3.2.1}	3	21	22	1	8	3	0	2	1	5	3	4	20	0	0
E2F5	E2F5_HUMAN.H11MO.0.B	E2F-related factors{3.3.2}	E2F{3.3.2.1}	9	43	46	0	2	5	0	7	0	0	6	0	36	0	0
E2F6	E2F6_HUMAN.H11MO.0.A	E2F-related factors{3.3.2}	E2F{3.3.2.1}	7	23	23	1	3	6	0	4	0	0	6	2	23	0	0
E2F7	E2F7_HUMAN.H11MO.0.B	E2F-related factors{3.3.2}	E2F{3.3.2.1}	3	20	20	0	3	3	0	3	0	2	3	2	17	0	0
EGR1	EGR1_HUMAN.H11MO.0.A	Three-zinc finger Krüppel-related factors{2.3.1}	EGR factors{2.3.1.3}	11	27	29	2	8	10	0	14	0	5	11	3	29	0	2
EGR2	EGR2_HUMAN.H11MO.0.A	Three-zinc finger Krüppel-related factors{2.3.1}	EGR factors{2.3.1.3}	14	25	28	3	8	13	0	14	1	4	14	4	27	0	1
EHF	EHF_HUMAN.H11MO.0.B	Ets-related factors{3.5.2}	EHF-like factors{3.5.2.4}	11	53	59	1	6	7	0	5	0	1	9	0	58	0	0
ELF1	ELF1_HUMAN.H11MO.0.A	Ets-related factors{3.5.2}	Elf-1-like factors{3.5.2.3}	5	61	63	4	10	3	0	3	4	0	5	0	58	0	0
ELF2	ELF2_HUMAN.H11MO.0.C	Ets-related factors{3.5.2}	Elf-1-like factors{3.5.2.3}	0	55	55	2	8	0	0	0	2	0	0	0	54	0	0
ELF3	ELF3_HUMAN.H11MO.0.A	Ets-related factors{3.5.2}	EHF-like factors{3.5.2.4}	12	49	52	1	3	9	0	7	0	0	10	0	50	0	0
ELF5	ELF5_HUMAN.H11MO.0.A	Ets-related factors{3.5.2}	EHF-like factors{3.5.2.4}	13	52	59	1	3	7	0	9	0	1	10	0	55	0	0
ELK1	ELK1_HUMAN.H11MO.0.B	Ets-related factors{3.5.2}	Elk-like factors{3.5.2.2}	5	56	57	7	18	5	0	2	7	1	5	1	56	0	0
ELK4	ELK4_HUMAN.H11MO.0.A	Ets-related factors{3.5.2}	Elk-like factors{3.5.2.2}	0	50	50	7	16	0	0	0	6	2	0	2	49	0	0
EPAS1	EPAS1_HUMAN.H11MO.0.B	PAS domain factors{1.2.5}	Ahr-like factors{1.2.5.1}	15	36	42	0	3	10	0	12	0	1	14	4	32	0	0
ERG	ERG_HUMAN.H11MO.0.A	Ets-related factors{3.5.2}	Ets-like factors{3.5.2.1}	1	50	51	0	1	1	0	0	0	0	1	0	50	0	0
ESRRA	ERR1_HUMAN.H11MO.0.A	Steroid hormone receptors (NR3){2.1.1}	ER-like receptors (NR3A&B){2.1.1.2}	15	40	42	0	2	13	0	12	0	0	13	1	36	0	0
ESRRB	ERR2_HUMAN.H11MO.0.A	Steroid hormone receptors (NR3){2.1.1}	ER-like receptors (NR3A&B){2.1.1.2}	10	47	53	0	0	5	0	2	0	0	6	0	38	0	0
ESRRG	ERR3_HUMAN.H11MO.0.B	Steroid hormone receptors (NR3){2.1.1}	ER-like receptors (NR3A&B){2.1.1.2}	9	33	39	0	1	0	0	5	0	0	6	0	33	0	0
ESR1	ESR1_HUMAN.H11MO.0.A	Steroid hormone receptors (NR3){2.1.1}	ER-like receptors (NR3A&B){2.1.1.2}	17	39	45	0	1	14	0	19	0	0	16	0	37	0	0
ESR2	ESR2_HUMAN.H11MO.0.A	Steroid hormone receptors (NR3){2.1.1}	ER-like receptors (NR3A&B){2.1.1.2}	15	41	43	1	2	14	0	13	0	0	14	0	39	0	0
ETS1	ETS1_HUMAN.H11MO.0.A	Ets-related factors{3.5.2}	Ets-like factors{3.5.2.1}	1	55	55	0	3	1	0	1	0	1	1	1	52	0	0
ETS2	ETS2_HUMAN.H11MO.0.B	Ets-related factors{3.5.2}	Ets-like factors{3.5.2.1}	5	29	33	1	5	3	0	1	0	1	4	0	25	0	0
ETV1	ETV1_HUMAN.H11MO.0.A	Ets-related factors{3.5.2}	Elk-like factors{3.5.2.2}	4	53	55	4	8	3	0	2	4	0	4	0	53	0	0
ETV2	ETV2_HUMAN.H11MO.0.B	Ets-related factors{3.5.2}	Ets-like factors{3.5.2.1}	11	58	66	0	0	9	0	11	0	0	10	2	61	0	0
ETV4	ETV4_HUMAN.H11MO.0.B	Ets-related factors{3.5.2}	Elk-like factors{3.5.2.2}	1	46	46	2	4	0	0	0	2	0	0	0	44	0	0
ETV5	ETV5_HUMAN.H11MO.0.C	Ets-related factors{3.5.2}	Elk-like factors{3.5.2.2}	4	46	48	1	3	3	0	4	0	0	3	0	46	0	0
MECOM	EVI1_HUMAN.H11MO.0.B	Factors with multiple dispersed zinc fingers{2.3.4}	Evi-1-like factors{2.3.4.14}	14	30	35	1	2	13	0	11	1	2	14	0	31	0	0
EVX2	EVX2_HUMAN.H11MO.0.A	HOX-related factors{3.1.1}	EVX (Even-skipped homolog){3.1.1.10}	5	44	44	0	0	5	0	4	0	0	5	1	38	0	0
FEV	FEV_HUMAN.H11MO.0.B	Ets-related factors{3.5.2}	Ets-like factors{3.5.2.1}	10	41	49	0	6	5	0	7	0	0	7	0	40	0	0
FEZF1	FEZF1_HUMAN.H11MO.0.C	More than 3 adjacent zinc finger factors{2.3.3}	FEZF factors{2.3.3.20}	9	42	44	0	7	5	0	3	0	0	6	1	38	0	0
FLI1	FLI1_HUMAN.H11MO.0.A	Ets-related factors{3.5.2}	Ets-like factors{3.5.2.1}	14	34	41	0	5	13	0	11	0	1	14	0	34	0	3
FOS	FOS_HUMAN.H11MO.0.A	Fos-related factors{1.1.2}	Fos factors{1.1.2.1}	8	34	39	5	10	4	1	4	3	1	5	1	27	1	0
FOSB	FOSB_HUMAN.H11MO.0.A	Fos-related factors{1.1.2}	Fos factors{1.1.2.1}	6	22	27	3	6	2	1	4	2	1	5	1	23	0	0
FOSL1	FOSL1_HUMAN.H11MO.0.A	Fos-related factors{1.1.2}	Fos factors{1.1.2.1}	4	49	51	4	11	3	1	3	3	2	4	4	47	1	0
FOSL2	FOSL2_HUMAN.H11MO.0.A	Fos-related factors{1.1.2}	Fos factors{1.1.2.1}	2	37	38	3	7	1	1	1	3	2	2	2	32	1	0
FOXA1	FOXA1_HUMAN.H11MO.0.A	Forkhead box (FOX) factors{3.3.1}	FOXA{3.3.1.1}	9	39	46	1	4	3	1	6	1	4	8	2	36	1	0
FOXA2	FOXA2_HUMAN.H11MO.0.A	Forkhead box (FOX) factors{3.3.1}	FOXA{3.3.1.1}	5	38	40	2	5	3	2	2	2	4	5	4	36	2	0
FOXA3	FOXA3_HUMAN.H11MO.0.B	Forkhead box (FOX) factors{3.3.1}	FOXA{3.3.1.1}	10	47	50	1	4	10	1	5	1	4	10	3	42	0	0
FOXC1	FOXC1_HUMAN.H11MO.0.C	Forkhead box (FOX) factors{3.3.1}	FOXC{3.3.1.3}	28	30	50	1	5	13	0	17	0	0	24	0	31	0	0
FOXH1	FOXH1_HUMAN.H11MO.0.A	Forkhead box (FOX) factors{3.3.1}	FOXH{3.3.1.8}	11	44	49	0	2	7	0	5	0	0	8	0	43	0	0
FOXI1	FOXI1_HUMAN.H11MO.0.B	Forkhead box (FOX) factors{3.3.1}	FOXI{3.3.1.9}	8	44	48	8	9	5	4	4	7	5	6	4	37	5	0
FOXJ2	FOXJ2_HUMAN.H11MO.0.C	Forkhead box (FOX) factors{3.3.1}	FOXJ{3.3.1.10}	9	25	31	0	5	5	0	6	0	1	9	4	17	0	0
FOXJ3	FOXJ3_HUMAN.H11MO.0.A	Forkhead box (FOX) factors{3.3.1}	FOXJ{3.3.1.10}	5	15	15	0	3	5	0	3	0	2	5	1	13	0	0
FOXK1	FOXK1_HUMAN.H11MO.0.A	Forkhead box (FOX) factors{3.3.1}	FOXK{3.3.1.11}	11	48	51	0	2	7	0	5	0	2	9	3	41	0	0
FOXM1	FOXM1_HUMAN.H11MO.0.A	Forkhead box (FOX) factors{3.3.1}	FOXM{3.3.1.13}	3	40	40	0	2	2	1	0	0	2	2	3	35	0	0
FOXO1	FOXO1_HUMAN.H11MO.0.A	Forkhead box (FOX) factors{3.3.1}	FOXO{3.3.1.15}	9	40	41	0	1	7	0	8	0	0	9	1	34	0	0
FOXO3	FOXO3_HUMAN.H11MO.0.B	Forkhead box (FOX) factors{3.3.1}	FOXO{3.3.1.15}	14	49	54	0	4	10	0	9	0	1	11	1	44	0	0
FOXO4	FOXO4_HUMAN.H11MO.0.C	Forkhead box (FOX) factors{3.3.1}	FOXO{3.3.1.15}	7	27	32	1	5	3	0	2	0	2	6	2	21	0	0
FOXP1	FOXP1_HUMAN.H11MO.0.A	Forkhead box (FOX) factors{3.3.1}	FOXP{3.3.1.16}	11	40	44	0	10	6	0	9	0	2	10	2	32	0	0
FOXP2	FOXP2_HUMAN.H11MO.0.C	Forkhead box (FOX) factors{3.3.1}	FOXP{3.3.1.16}	18	48	52	0	5	15	0	10	0	1	18	1	41	0	0
FOXQ1	FOXQ1_HUMAN.H11MO.0.C	Forkhead box (FOX) factors{3.3.1}	FOXQ{3.3.1.17}	5	34	35	1	5	4	0	2	1	0	5	2	29	0	0
GABPA	GABPA_HUMAN.H11MO.0.A	Ets-related factors{3.5.2}	Ets-like factors{3.5.2.1}	5	51	53	5	16	4	0	2	5	1	4	2	49	0	0
GATA1	GATA1_HUMAN.H11MO.0.A	GATA-type zinc fingers{2.2.1}	Two zinc-finger GATA factors{2.2.1.1}	15	51	66	3	8	8	0	28	3	4	13	1	55	3	0
GATA2	GATA2_HUMAN.H11MO.0.A	GATA-type zinc fingers{2.2.1}	Two zinc-finger GATA factors{2.2.1.1}	26	48	72	5	7	17	0	26	5	3	23	1	57	0	0
GATA3	GATA3_HUMAN.H11MO.0.A	GATA-type zinc fingers{2.2.1}	Two zinc-finger GATA factors{2.2.1.1}	5	27	27	0	5	4	0	2	0	0	4	0	21	0	0
GATA4	GATA4_HUMAN.H11MO.0.A	GATA-type zinc fingers{2.2.1}	Two zinc-finger GATA factors{2.2.1.1}	2	36	37	9	12	2	0	0	7	3	2	0	33	1	0
GATA6	GATA6_HUMAN.H11MO.0.A	GATA-type zinc fingers{2.2.1}	Two zinc-finger GATA factors{2.2.1.1}	5	47	49	4	10	3	0	1	3	2	4	0	38	1	0
NR3C1	GCR_HUMAN.H11MO.0.A	Steroid hormone receptors (NR3){2.1.1}	GR-like receptors (NR3C){2.1.1.1}	16	44	53	1	3	14	0	20	1	1	16	0	46	0	0
GFI1	GFI1_HUMAN.H11MO.0.C	More than 3 adjacent zinc finger factors{2.3.3}	GFI1 factors{2.3.3.21}	1	14	17	4	4	1	0	0	0	0	1	0	12	0	0
GFI1B	GFI1B_HUMAN.H11MO.0.A	More than 3 adjacent zinc finger factors{2.3.3}	GFI1 factors{2.3.3.21}	2	22	23	1	3	2	0	2	0	0	2	0	18	0	0
GLI3	GLI3_HUMAN.H11MO.0.B	More than 3 adjacent zinc finger factors{2.3.3}	GLI-like factors{2.3.3.1}	2	31	31	3	6	1	0	1	2	1	1	0	29	0	0
GRHL2	GRHL2_HUMAN.H11MO.0.A	Grainyhead-related factors{6.7.1}	GRH-like proteins{6.7.1.1}	1	59	59	2	6	0	0	1	0	1	0	0	46	0	0
NHLH1	HEN1_HUMAN.H11MO.0.C	Tal-related factors{1.2.3}	Tal / HEN-like factors{1.2.3.1}	28	50	58	0	2	24	0	31	0	1	26	1	49	0	0
HIC1	HIC1_HUMAN.H11MO.0.C	Factors with multiple dispersed zinc fingers{2.3.4}	Hypermethylated in Cancer proteins{2.3.4.17}	9	40	44	0	5	5	0	3	0	1	7	0	40	0	0
HIF1A	HIF1A_HUMAN.H11MO.0.C	PAS domain factors{1.2.5}	Ahr-like factors{1.2.5.1}	16	31	36	0	6	11	0	10	0	3	15	2	24	0	0
HINFP	HINFP_HUMAN.H11MO.0.C	Factors with multiple dispersed zinc fingers{2.3.4}	HINFP-like factors{2.3.4.21}	16	45	55	0	1	13	0	15	0	0	14	0	48	0	0
HLF	HLF_HUMAN.H11MO.0.C	C/EBP-related{1.1.8}	PAR factors{1.1.8.2}	7	42	45	0	2	6	0	7	0	0	7	0	40	0	0
HNF1A	HNF1A_HUMAN.H11MO.0.C	POU domain factors{3.1.10}	HNF1-like factors{3.1.10.7}	8	22	27	0	3	7	0	8	0	0	8	1	23	0	0
HNF1B	HNF1B_HUMAN.H11MO.0.A	POU domain factors{3.1.10}	HNF1-like factors{3.1.10.7}	6	26	29	0	4	6	0	6	0	0	6	0	24	0	0
HNF4A	HNF4A_HUMAN.H11MO.0.A	RXR-related receptors (NR2){2.1.3}	HNF-4 (NR2A){2.1.3.2}	14	50	54	3	6	14	0	15	3	1	14	1	51	0	0
HNF4G	HNF4G_HUMAN.H11MO.0.B	RXR-related receptors (NR2){2.1.3}	HNF-4 (NR2A){2.1.3.2}	15	51	56	3	5	14	0	17	3	1	14	1	51	0	0
ONECUT1	HNF6_HUMAN.H11MO.0.B	HD-CUT factors{3.1.9}	ONECUT{3.1.9.1}	3	28	30	1	2	0	0	2	0	0	2	0	23	0	0
HSF1	HSF1_HUMAN.H11MO.0.A	HSF factors{3.4.1}	HSF1 (HSTF1){3.4.1.0.1}	7	38	43	0	3	6	0	7	0	0	6	0	40	0	0
HSF2	HSF2_HUMAN.H11MO.0.A	HSF factors{3.4.1}	HSF2 (HSTF2){3.4.1.0.2}	10	30	37	0	1	7	0	6	0	0	8	0	31	0	0
TCF12	HTF4_HUMAN.H11MO.0.A	E2A-related factors{1.2.1}	HTF-4 (TCF-12, HEB){1.2.1.0.3}	2	37	36	1	2	2	0	0	1	0	2	1	34	0	0
HOXA1	HXA1_HUMAN.H11MO.0.C	HOX-related factors{3.1.1}	HOX1{3.1.1.1}	0	34	35	2	2	0	0	0	1	1	0	0	27	0	0
HOXA10	HXA10_HUMAN.H11MO.0.C	HOX-related factors{3.1.1}	HOX9-13{3.1.1.8}	8	31	32	0	3	5	0	6	0	1	7	2	27	0	0
HOXA13	HXA13_HUMAN.H11MO.0.C	HOX-related factors{3.1.1}	HOX9-13{3.1.1.8}	8	38	40	0	2	5	0	4	0	0	6	0	29	0	0
HOXA9	HXA9_HUMAN.H11MO.0.B	HOX-related factors{3.1.1}	HOX9-13{3.1.1.8}	0	21	21	0	1	0	0	0	0	0	0	1	16	0	0
HOXB13	HXB13_HUMAN.H11MO.0.A	HOX-related factors{3.1.1}	HOX9-13{3.1.1.8}	9	50	49	0	0	6	0	3	0	0	6	1	40	0	0
HOXB4	HXB4_HUMAN.H11MO.0.B	HOX-related factors{3.1.1}	HOX4{3.1.1.4}	14	40	44	0	4	6	0	7	0	0	13	0	37	0	0
HOXB7	HXB7_HUMAN.H11MO.0.C	HOX-related factors{3.1.1}	HOX6-7{3.1.1.6}	6	24	29	1	3	2	0	3	0	0	4	0	20	0	0
HOXB8	HXB8_HUMAN.H11MO.0.C	HOX-related factors{3.1.1}	HOX8{3.1.1.7}	6	17	18	0	1	6	0	3	0	0	6	0	15	0	0
HOXC9	HXC9_HUMAN.H11MO.0.C	HOX-related factors{3.1.1}	HOX9-13{3.1.1.8}	10	32	34	0	2	6	0	7	0	0	7	1	28	0	0
IKZF1	IKZF1_HUMAN.H11MO.0.C	Factors with multiple dispersed zinc fingers{2.3.4}	Ikaros{2.3.4.4}	0	0	0	0	0	0	0	0	0	0	0	0	0	0	0
INSM1	INSM1_HUMAN.H11MO.0.C	Factors with multiple dispersed zinc fingers{2.3.4}	Insulinoma-associated proteins{2.3.4.16}	6	35	35	1	5	6	0	3	0	3	6	2	33	0	0
IRF1	IRF1_HUMAN.H11MO.0.A	Interferon-regulatory factors{3.5.3}	IRF-1{3.5.3.0.1}	14	14	17	0	3	13	0	10	0	0	13	1	12	0	0
IRF2	IRF2_HUMAN.H11MO.0.A	Interferon-regulatory factors{3.5.3}	IRF-2{3.5.3.0.2}	15	22	30	0	2	13	0	20	0	1	14	2	26	0	0
IRF3	IRF3_HUMAN.H11MO.0.B	Interferon-regulatory factors{3.5.3}	IRF-3{3.5.3.0.3}	12	16	20	0	5	11	0	14	0	2	12	1	18	0	1
IRF4	IRF4_HUMAN.H11MO.0.A	Interferon-regulatory factors{3.5.3}	IRF-4 (LSIRF, NF-EM5, MUM1, Pip){3.5.3.0.4}	14	45	48	1	4	12	0	14	0	1	13	3	39	0	0
IRF7	IRF7_HUMAN.H11MO.0.C	Interferon-regulatory factors{3.5.3}	IRF-7{3.5.3.0.7}	17	34	39	0	2	14	0	11	0	0	17	1	30	0	0
IRF8	IRF8_HUMAN.H11MO.0.B	Interferon-regulatory factors{3.5.3}	IRF-8 (ICSBP1){3.5.3.0.8}	14	36	45	1	4	11	0	16	0	2	13	2	38	0	0
IRF9	IRF9_HUMAN.H11MO.0.C	Interferon-regulatory factors{3.5.3}	IRF-9 (ISGF-3gamma){3.5.3.0.9}	8	28	31	0	2	6	0	5	0	1	8	1	26	0	0
ISL1	ISL1_HUMAN.H11MO.0.A	HD-LIM factors{3.1.5}	ISL{3.1.5.1}	3	41	44	0	1	2	0	2	0	0	3	0	36	0	0
TCF4	ITF2_HUMAN.H11MO.0.C	E2A-related factors{1.2.1}	SEF2 (E2-2, TCF-4, ITF-2){1.2.1.0.2}	1	32	32	2	2	1	0	0	1	0	1	0	27	0	0
JUN	JUN_HUMAN.H11MO.0.A	Jun-related factors{1.1.1}	Jun factors{1.1.1.1}	5	34	37	2	8	3	1	2	1	2	4	2	32	0	0
JUNB	JUNB_HUMAN.H11MO.0.A	Jun-related factors{1.1.1}	Jun factors{1.1.1.1}	3	38	43	4	8	1	1	1	4	4	3	4	38	1	0
JUND	JUND_HUMAN.H11MO.0.A	Jun-related factors{1.1.1}	Jun factors{1.1.1.1}	4	31	32	4	9	2	1	1	3	2	3	4	26	0	0
ZBTB33	KAISO_HUMAN.H11MO.0.A	Other factors with up to three adjacent zinc fingers{2.3.2}	Factors with 2-3 adjacent zinc fingersand a BTB/POZ domain{2.3.2.1}	11	35	38	0	1	10	0	18	0	0	11	1	35	0	0
KLF1	KLF1_HUMAN.H11MO.0.A	Three-zinc finger Krüppel-related factors{2.3.1}	Krüppel-like factors{2.3.1.2}	0	13	14	0	2	0	0	0	0	1	0	0	11	0	0
KLF12	KLF12_HUMAN.H11MO.0.C	Three-zinc finger Krüppel-related factors{2.3.1}	Krüppel-like factors{2.3.1.2}	0	23	23	10	12	0	0	0	6	5	0	2	19	2	0
KLF15	KLF15_HUMAN.H11MO.0.A	Three-zinc finger Krüppel-related factors{2.3.1}	Krüppel-like factors{2.3.1.2}	16	24	26	1	8	15	0	16	1	6	15	6	23	0	0
KLF3	KLF3_HUMAN.H11MO.0.B	Three-zinc finger Krüppel-related factors{2.3.1}	Krüppel-like factors{2.3.1.2}	0	25	26	7	11	0	0	2	7	3	0	4	23	1	0
KLF4	KLF4_HUMAN.H11MO.0.A	Three-zinc finger Krüppel-related factors{2.3.1}	Krüppel-like factors{2.3.1.2}	2	15	16	4	8	2	0	1	1	2	2	2	13	0	0
KLF5	KLF5_HUMAN.H11MO.0.A	Three-zinc finger Krüppel-related factors{2.3.1}	Krüppel-like factors{2.3.1.2}	1	17	18	3	5	1	0	2	1	3	1	3	16	1	0
KLF6	KLF6_HUMAN.H11MO.0.A	Three-zinc finger Krüppel-related factors{2.3.1}	Krüppel-like factors{2.3.1.2}	3	21	24	3	5	3	0	4	1	2	3	0	21	0	0
KLF8	KLF8_HUMAN.H11MO.0.C	Three-zinc finger Krüppel-related factors{2.3.1}	Krüppel-like factors{2.3.1.2}	11	43	46	0	3	3	0	8	0	2	8	2	32	0	0
KLF9	KLF9_HUMAN.H11MO.0.C	Three-zinc finger Krüppel-related factors{2.3.1}	Krüppel-like factors{2.3.1.2}	3	16	16	4	5	3	0	2	3	2	3	2	15	0	0
LEF1	LEF1_HUMAN.H11MO.0.A	TCF-7-related factors{4.1.3}	LEF-1 (TCF-1alpha) [1]{4.1.3.0.4}	9	32	37	0	3	7	0	10	0	1	8	2	36	0	0
LHX2	LHX2_HUMAN.H11MO.0.A	HD-LIM factors{3.1.5}	Lhx-2-like factors{3.1.5.3}	5	37	42	0	3	3	0	3	0	0	4	0	34	0	0
LHX3	LHX3_HUMAN.H11MO.0.C	HD-LIM factors{3.1.5}	Lhx-3-like factors{3.1.5.4}	4	16	18	0	0	4	0	2	0	0	4	0	17	0	0
LYL1	LYL1_HUMAN.H11MO.0.A	Tal-related factors{1.2.3}	Tal / HEN-like factors{1.2.3.1}	20	49	54	0	4	18	0	20	0	1	20	0	50	0	0
MAF	MAF_HUMAN.H11MO.0.A	Maf-related factors{1.1.3}	Large Maf factors{1.1.3.1}	23	56	72	1	5	12	0	17	0	0	21	1	51	0	0
MAFB	MAFB_HUMAN.H11MO.0.B	Maf-related factors{1.1.3}	Large Maf factors{1.1.3.1}	11	53	56	0	4	5	0	7	0	2	8	3	48	0	0
MAFF	MAFF_HUMAN.H11MO.0.B	Maf-related factors{1.1.3}	Small Maf factors{1.1.3.2}	15	44	54	0	3	12	0	21	0	2	14	2	44	0	0
MAFG	MAFG_HUMAN.H11MO.0.A	Maf-related factors{1.1.3}	Small Maf factors{1.1.3.2}	10	44	52	0	3	9	0	13	0	0	10	0	46	0	0
MAFK	MAFK_HUMAN.H11MO.0.A	Maf-related factors{1.1.3}	Small Maf factors{1.1.3.2}	14	43	58	0	5	13	0	18	0	0	13	0	54	0	0
MAX	MAX_HUMAN.H11MO.0.A	bHLH-ZIP factors{1.2.6}	Myc / Max factors{1.2.6.5}	5	35	36	0	0	5	0	1	0	0	5	0	30	0	0
MAZ	MAZ_HUMAN.H11MO.0.A	Factors with multiple dispersed zinc fingers{2.3.4}	MAZ-like factors{2.3.4.8}	16	19	22	1	6	15	0	19	1	5	15	5	21	0	1
MBD2	MBD2_HUMAN.H11MO.0.B			4	35	36	0	7	3	0	1	0	6	3	5	34	0	0
MEF2A	MEF2A_HUMAN.H11MO.0.A	Regulators of differentiation{5.1.1}	MEF-2{5.1.1.1}	1	16	17	2	2	0	0	2	0	0	1	0	8	0	0
MEF2B	MEF2B_HUMAN.H11MO.0.A	Regulators of differentiation{5.1.1}	MEF-2{5.1.1.1}	6	22	24	1	3	4	0	3	0	0	6	0	15	0	0
MEF2C	MEF2C_HUMAN.H11MO.0.A	Regulators of differentiation{5.1.1}	MEF-2{5.1.1.1}	1	14	14	2	2	1	0	2	0	0	1	0	10	0	0
MEF2D	MEF2D_HUMAN.H11MO.0.A	Regulators of differentiation{5.1.1}	MEF-2{5.1.1.1}	1	14	16	1	1	0	0	1	0	0	1	0	11	0	0
MEIS1	MEIS1_HUMAN.H11MO.0.A	TALE-type homeo domain factors{3.1.4}	MEIS{3.1.4.2}	1	31	33	0	0	0	0	1	0	0	1	0	25	0	0
MEIS2	MEIS2_HUMAN.H11MO.0.B	TALE-type homeo domain factors{3.1.4}	MEIS{3.1.4.2}	16	61	64	2	5	16	0	15	0	2	16	1	60	0	0
MITF	MITF_HUMAN.H11MO.0.A	bHLH-ZIP factors{1.2.6}	TFE3-like factors{1.2.6.1}	0	31	31	2	4	0	0	1	2	0	0	0	27	0	0
MTF1	MTF1_HUMAN.H11MO.0.C	More than 3 adjacent zinc finger factors{2.3.3}	MTF1-like factors{2.3.3.24}	23	48	54	0	5	21	0	20	0	1	23	0	43	0	0
MXI1	MXI1_HUMAN.H11MO.0.A	bHLH-ZIP factors{1.2.6}	Mad-like factors{1.2.6.7}	12	36	43	0	2	11	0	15	0	2	12	2	40	0	0
MYB	MYB_HUMAN.H11MO.0.A	Myb/SANT domain factors{3.5.1}	Myb-like factors{3.5.1.1}	0	53	53	3	6	0	0	0	2	1	0	0	52	0	0
MYC	MYC_HUMAN.H11MO.0.A	bHLH-ZIP factors{1.2.6}	Myc / Max factors{1.2.6.5}	2	37	37	0	0	2	0	0	0	0	2	0	36	0	0
MYCN	MYCN_HUMAN.H11MO.0.A	bHLH-ZIP factors{1.2.6}	Myc / Max factors{1.2.6.5}	2	46	46	0	3	2	0	1	0	1	2	1	43	0	0
MYOD1	MYOD1_HUMAN.H11MO.0.A	MyoD / ASC-related factors{1.2.2}	Myogenic transcription factors{1.2.2.1}	15	55	57	2	4	15	0	15	2	3	15	3	52	0	0
MYOG	MYOG_HUMAN.H11MO.0.B	MyoD / ASC-related factors{1.2.2}	Myogenic transcription factors{1.2.2.1}	3	46	47	2	3	3	0	1	2	1	3	1	45	0	0
MZF1	MZF1_HUMAN.H11MO.0.B	More than 3 adjacent zinc finger factors{2.3.3}	unclassified{2.3.3.0}	5	32	30	0	5	5	0	4	0	1	5	0	25	0	0
NANOG	NANOG_HUMAN.H11MO.0.A	NK-related factors{3.1.2}	NANOG{3.1.2.12}	8	37	40	1	2	8	0	12	0	0	8	0	39	0	0
NEUROD1	NDF1_HUMAN.H11MO.0.A	Tal-related factors{1.2.3}	Neurogenin / Atonal-like factors{1.2.3.4}	2	38	39	1	1	2	0	1	1	0	2	0	28	0	0
NEUROD2	NDF2_HUMAN.H11MO.0.B	Tal-related factors{1.2.3}	Neurogenin / Atonal-like factors{1.2.3.4}	8	39	43	0	1	5	0	6	0	0	5	0	35	0	0
NFE2L2	NF2L2_HUMAN.H11MO.0.A	Jun-related factors{1.1.1}	NF-E2-like factors{1.1.1.2}	8	54	57	0	6	7	0	8	0	3	8	1	54	0	0
NFATC1	NFAC1_HUMAN.H11MO.0.B	NFAT-related factors{6.1.3}	NFATc1{6.1.3.0.1}	15	38	48	0	3	10	0	12	0	1	13	1	34	0	0
NFATC2	NFAC2_HUMAN.H11MO.0.B	NFAT-related factors{6.1.3}	NFATc2 (NFATp, NFAT1){6.1.3.0.2}	3	29	30	4	6	3	0	3	0	0	3	0	23	0	0
NFATC3	NFAC3_HUMAN.H11MO.0.B	NFAT-related factors{6.1.3}	NFATc3 (NFATx){6.1.3.0.3}	4	34	35	6	6	3	0	2	1	0	4	0	26	0	0
NFATC4	NFAC4_HUMAN.H11MO.0.C	NFAT-related factors{6.1.3}	NFATc4 (NFAT3){6.1.3.0.4}	2	34	34	0	0	2	0	1	0	0	2	0	26	0	0
NFE2	NFE2_HUMAN.H11MO.0.A	Jun-related factors{1.1.1}	NF-E2-like factors{1.1.1.2}	7	40	48	1	7	2	1	3	1	3	5	3	41	1	0
NFIA	NFIA_HUMAN.H11MO.0.C	Nuclear factor 1{7.1.2}	NF-1A (NF-IA){7.1.2.0.1}	14	42	51	0	3	12	0	20	0	2	14	3	45	0	0
NFIC	NFIC_HUMAN.H11MO.0.A	Nuclear factor 1{7.1.2}	NF-1C (NF-IC){7.1.2.0.3}	22	36	44	0	5	20	0	26	0	4	21	4	41	0	0
NFKB1	NFKB1_HUMAN.H11MO.0.A	NF-kappaB-related factors{6.1.1}	NF-kappaB p50 subunit-like factors{6.1.1.1}	11	27	30	4	8	6	0	8	0	0	9	0	20	0	0
NFKB2	NFKB2_HUMAN.H11MO.0.B	NF-kappaB-related factors{6.1.1}	NF-kappaB p50 subunit-like factors{6.1.1.1}	6	32	33	1	2	5	0	4	0	0	5	0	28	0	0
NFYA	NFYA_HUMAN.H11MO.0.A	Heteromeric CCAAT-binding factors{4.2.1}	NF-YA (CP1A, CBF-B){4.2.1.0.1}	5	45	46	17	19	3	6	4	14	7	4	6	44	6	0
NFYB	NFYB_HUMAN.H11MO.0.A	Heteromeric CCAAT-binding factors{4.2.1}	NF-YB (CP1B, CBF-A){4.2.1.0.2}	4	50	51	16	17	3	5	1	12	7	3	6	46	6	0
NFYC	NFYC_HUMAN.H11MO.0.A	Heteromeric CCAAT-binding factors{4.2.1}	NF-YC{4.2.1.0.3}	1	49	51	17	17	1	5	2	12	7	1	6	48	7	0
NKX2-1	NKX21_HUMAN.H11MO.0.A	NK-related factors{3.1.2}	NK-2.1{3.1.2.14}	2	32	34	1	5	2	0	0	0	0	2	0	25	0	0
NKX2-5	NKX25_HUMAN.H11MO.0.B	NK-related factors{3.1.2}	NK-4{3.1.2.17}	10	21	24	1	3	8	0	5	0	0	9	1	20	0	0
NKX2-8	NKX28_HUMAN.H11MO.0.C	NK-related factors{3.1.2}	NK-2.2{3.1.2.15}	4	27	28	2	2	4	0	3	1	0	4	0	17	0	0
NKX3-1	NKX31_HUMAN.H11MO.0.C	NK-related factors{3.1.2}	NK-3{3.1.2.16}	6	24	26	4	6	5	0	6	1	0	6	0	23	0	0
NKX3-2	NKX32_HUMAN.H11MO.0.C	NK-related factors{3.1.2}	NK-3{3.1.2.16}	9	26	28	1	2	8	0	7	1	0	8	0	26	0	0
NKX6-1	NKX61_HUMAN.H11MO.0.B	NK-related factors{3.1.2}	NK-6{3.1.2.19}	23	29	46	0	1	17	0	26	0	0	19	0	31	0	0
NOBOX	NOBOX_HUMAN.H11MO.0.C	Paired-related HD factors{3.1.3}	NOBOX{3.1.3.15}	7	27	32	1	3	5	0	6	1	0	6	0	25	0	0
NR1D1	NR1D1_HUMAN.H11MO.0.B	Thyroid hormone receptor-related factors (NR1){2.1.2}	Rev-ErbA (NR1D){2.1.2.3}	28	38	51	0	2	23	0	26	0	0	26	0	43	0	0
NR1H3	NR1H3_HUMAN.H11MO.0.B	Thyroid hormone receptor-related factors (NR1){2.1.2}	LXR (NR1H){2.1.2.7}	48	61	76	0	5	42	0	54	0	1	45	0	64	0	0
NR1H4	NR1H4_HUMAN.H11MO.0.B	Thyroid hormone receptor-related factors (NR1){2.1.2}	LXR (NR1H){2.1.2.7}	17	30	40	0	6	16	0	27	0	6	16	6	37	0	0
NR1I2	NR1I2_HUMAN.H11MO.0.C	Thyroid hormone receptor-related factors (NR1){2.1.2}	Vitamin D receptor (NR1I){2.1.2.4}	33	58	74	2	3	28	0	34	2	0	30	0	65	0	0
NR1I3	NR1I3_HUMAN.H11MO.0.C	Thyroid hormone receptor-related factors (NR1){2.1.2}	Vitamin D receptor (NR1I){2.1.2.4}	20	43	54	1	4	17	0	25	1	0	19	0	45	0	0
NR2C1	NR2C1_HUMAN.H11MO.0.C	RXR-related receptors (NR2){2.1.3}	Testicular receptors (NR2C){2.1.3.4}	14	44	51	1	6	12	0	10	1	3	12	1	43	0	0
NR2C2	NR2C2_HUMAN.H11MO.0.B	RXR-related receptors (NR2){2.1.3}	Testicular receptors (NR2C){2.1.3.4}	7	52	53	0	6	7	0	6	0	1	7	2	51	0	0
NR2E3	NR2E3_HUMAN.H11MO.0.C	RXR-related receptors (NR2){2.1.3}	Tailless-like receptors (NR2E){2.1.3.3}	12	44	50	1	3	6	0	10	0	0	9	0	39	0	0
NR4A1	NR4A1_HUMAN.H11MO.0.A	NGFI-B-related receptors (NR4){2.1.4}	NGFI-B (NR4A1){2.1.4.0.1}	11	53	58	1	2	6	0	6	1	0	10	0	43	0	0
NR4A2	NR4A2_HUMAN.H11MO.0.C	NGFI-B-related receptors (NR4){2.1.4}	NURR1 (NR4A2){2.1.4.0.2}	9	44	50	0	1	4	0	5	0	1	8	1	39	0	0
NR5A2	NR5A2_HUMAN.H11MO.0.B	FTZ-F1-related receptors (NR5){2.1.5}	LRH-1 (NR5A2){2.1.5.0.2}	4	42	41	0	3	4	0	2	0	0	4	1	40	0	0
NR6A1	NR6A1_HUMAN.H11MO.0.B	GCNF-related receptors (NR6){2.1.6}	GCNF (NR6A1){2.1.6.0.1}	11	48	55	0	1	11	0	10	0	0	11	0	49	0	0
NRF1	NRF1_HUMAN.H11MO.0.A	NRF{0.0.6}	NRF-1 (alpha-pal){0.0.6.0.1}	15	46	48	2	8	14	0	17	2	7	15	8	42	0	0
OLIG2	OLIG2_HUMAN.H11MO.0.B	Tal-related factors{1.2.3}	Neurogenin / Atonal-like factors{1.2.3.4}	33	52	67	0	4	29	0	41	0	1	32	1	58	0	0
OSR2	OSR2_HUMAN.H11MO.0.C	More than 3 adjacent zinc finger factors{2.3.3}	unclassified{2.3.3.0}	11	40	41	0	2	10	0	10	0	0	11	0	32	0	0
OTX2	OTX2_HUMAN.H11MO.0.A	Paired-related HD factors{3.1.3}	OTX{3.1.3.17}	1	25	24	0	0	0	0	1	0	0	1	0	19	0	0
OVOL1	OVOL1_HUMAN.H11MO.0.C	More than 3 adjacent zinc finger factors{2.3.3}	OVOL-factors{2.3.3.17}	11	47	52	4	6	6	0	6	0	1	11	0	46	0	0
ZNF146	OZF_HUMAN.H11MO.0.C	More than 3 adjacent zinc finger factors{2.3.3}	ZNF146-like factors{2.3.3.55}	42	37	57	0	1	27	0	48	0	0	38	0	36	0	0
TP53	P53_HUMAN.H11MO.0.A	p53-related factors{6.3.1}	p53{6.3.1.0.1}	30	53	65	0	7	26	0	36	0	3	30	1	59	0	0
TP63	P63_HUMAN.H11MO.0.A	p53-related factors{6.3.1}	p63{6.3.1.0.2}	33	57	66	0	4	31	0	46	0	3	33	4	61	0	0
TP73	P73_HUMAN.H11MO.0.A	p53-related factors{6.3.1}	p73{6.3.1.0.3}	32	61	73	0	3	28	0	37	0	1	29	1	62	0	0
PATZ1	PATZ1_HUMAN.H11MO.0.C	Factors with multiple dispersed zinc fingers{2.3.4}	MAZ-like factors{2.3.4.8}	16	25	29	1	7	15	0	17	1	5	16	6	28	0	0
PAX5	PAX5_HUMAN.H11MO.0.A	Paired domain only{3.2.2}	PAX-2-like factors (partial homeobox){3.2.2.2}	24	39	54	3	8	11	0	17	1	0	13	0	29	0	0
PAX6	PAX6_HUMAN.H11MO.0.C	Paired plus homeo domain{3.2.1}	PAX-4/6{3.2.1.2}	5	44	49	1	2	2	0	2	0	0	3	0	44	0	0
PBX1	PBX1_HUMAN.H11MO.0.A	TALE-type homeo domain factors{3.1.4}	PBX{3.1.4.4}	12	58	58	1	3	12	0	7	0	2	12	3	48	0	0
PBX2	PBX2_HUMAN.H11MO.0.C	TALE-type homeo domain factors{3.1.4}	PBX{3.1.4.4}	12	41	47	1	2	10	0	9	1	0	12	0	40	0	0
PBX3	PBX3_HUMAN.H11MO.0.A	TALE-type homeo domain factors{3.1.4}	PBX{3.1.4.4}	5	54	54	1	11	5	0	3	0	6	5	6	54	0	0
PDX1	PDX1_HUMAN.H11MO.0.A	HOX-related factors{3.1.1}	PDX{3.1.1.15}	6	31	33	0	4	4	0	4	0	0	5	0	27	0	0
CBFB	PEBB_HUMAN.H11MO.0.C			2	49	49	1	3	2	0	1	1	0	2	0	48	0	0
POU1F1	PIT1_HUMAN.H11MO.0.C	POU domain factors{3.1.10}	POU1 (Pit-1-like factors){3.1.10.1}	9	27	28	2	2	9	0	9	0	0	9	0	23	0	0
PKNOX1	PKNX1_HUMAN.H11MO.0.B	TALE-type homeo domain factors{3.1.4}	PKNOX{3.1.4.5}	5	54	55	1	9	5	0	1	0	3	5	3	50	0	0
POU2F1	PO2F1_HUMAN.H11MO.0.C	POU domain factors{3.1.10}	POU2 (Oct-1/2-like factors){3.1.10.2}	10	41	42	0	1	8	0	11	0	0	9	0	40	0	0
POU2F2	PO2F2_HUMAN.H11MO.0.A	POU domain factors{3.1.10}	POU2 (Oct-1/2-like factors){3.1.10.2}	4	29	31	0	0	4	0	4	0	0	4	0	27	0	0
POU3F1	PO3F1_HUMAN.H11MO.0.C	POU domain factors{3.1.10}	POU3 (Oct-6-like factors){3.1.10.3}	6	33	39	0	0	4	0	5	0	0	6	0	35	0	0
POU3F2	PO3F2_HUMAN.H11MO.0.A	POU domain factors{3.1.10}	POU3 (Oct-6-like factors){3.1.10.3}	22	46	58	2	5	20	0	25	1	1	22	0	51	0	1
POU5F1	PO5F1_HUMAN.H11MO.0.A	POU domain factors{3.1.10}	POU5 (Oct-3/4-like factors){3.1.10.5}	5	34	38	1	2	5	0	7	0	0	5	0	36	0	0
PPARA	PPARA_HUMAN.H11MO.0.B	Thyroid hormone receptor-related factors (NR1){2.1.2}	PPAR (NR1C){2.1.2.5}	16	51	60	0	2	16	0	19	0	0	16	0	57	0	0
PPARG	PPARG_HUMAN.H11MO.0.A	Thyroid hormone receptor-related factors (NR1){2.1.2}	PPAR (NR1C){2.1.2.5}	23	55	60	0	2	20	0	13	0	0	22	0	53	0	0
PRDM14	PRD14_HUMAN.H11MO.0.A	More than 3 adjacent zinc finger factors{2.3.3}	unclassified{2.3.3.0}	11	43	50	1	1	4	0	10	0	0	7	0	38	0	0
PRDM1	PRDM1_HUMAN.H11MO.0.A	More than 3 adjacent zinc finger factors{2.3.3}	PRDM1-like factors{2.3.3.12}	7	29	31	0	1	6	0	5	0	0	7	1	28	0	0
PRDM6	PRDM6_HUMAN.H11MO.0.C	More than 3 adjacent zinc finger factors{2.3.3}	unclassified{2.3.3.0}	8	30	34	0	3	6	0	3	0	1	7	1	24	0	0
PGR	PRGR_HUMAN.H11MO.0.A	Steroid hormone receptors (NR3){2.1.1}	GR-like receptors (NR3C){2.1.1.1}	15	44	51	0	5	13	0	16	0	0	14	1	42	0	0
PTF1A	PTF1A_HUMAN.H11MO.0.B	Tal-related factors{1.2.3}	Twist-like factors{1.2.3.2}	28	53	68	0	4	24	0	43	0	1	28	0	56	0	0
RARA	RARA_HUMAN.H11MO.0.A	Thyroid hormone receptor-related factors (NR1){2.1.2}	Retinoic acid receptors (NR1B){2.1.2.1}	23	37	52	2	5	16	0	27	0	0	22	0	39	0	0
RARG	RARG_HUMAN.H11MO.0.B	Thyroid hormone receptor-related factors (NR1){2.1.2}	Retinoic acid receptors (NR1B){2.1.2.1}	25	47	58	0	4	22	0	31	0	3	25	1	51	0	0
REL	REL_HUMAN.H11MO.0.B	NF-kappaB-related factors{6.1.1}	NF-kappaB p65 subunit-like factors{6.1.1.2}	9	52	55	0	2	7	0	7	0	0	9	0	47	0	0
RELB	RELB_HUMAN.H11MO.0.C	NF-kappaB-related factors{6.1.1}	NF-kappaB p65 subunit-like factors{6.1.1.2}	2	44	46	0	1	2	0	2	0	0	2	0	40	0	0
REST	REST_HUMAN.H11MO.0.A	Factors with multiple dispersed zinc fingers{2.3.4}	unclassified{2.3.4.0}	32	62	74	0	2	28	0	41	0	1	30	1	65	0	0
RFX1	RFX1_HUMAN.H11MO.0.B	RFX-related factors{3.3.3}	RFX1 (EF-C){3.3.3.0.1}	36	49	61	0	11	35	0	45	0	5	35	6	54	0	0
RFX2	RFX2_HUMAN.H11MO.0.A	RFX-related factors{3.3.3}	RFX2{3.3.3.0.2}	17	50	61	2	14	12	0	14	1	2	16	2	54	0	0
RFX3	RFX3_HUMAN.H11MO.0.B	RFX-related factors{3.3.3}	RFX3{3.3.3.0.3}	7	59	63	5	9	6	0	5	4	0	6	0	58	0	0
RFX5	RFX5_HUMAN.H11MO.0.A	RFX-related factors{3.3.3}	RFX5{3.3.3.0.5}	18	59	68	0	1	15	0	24	0	0	17	0	59	0	0
RORA	RORA_HUMAN.H11MO.0.C	Thyroid hormone receptor-related factors (NR1){2.1.2}	ROR (NR1F){2.1.2.6}	14	43	49	0	2	6	0	10	0	0	11	0	36	0	0
RORC	RORG_HUMAN.H11MO.0.C	Thyroid hormone receptor-related factors (NR1){2.1.2}	ROR (NR1F){2.1.2.6}	7	56	58	0	12	3	0	5	0	6	4	5	55	0	0
RUNX1	RUNX1_HUMAN.H11MO.0.A	Runt-related factors{6.4.1}	Runx1 (PEBP2alphaB, CBF-alpha2, AML-1){6.4.1.0.2}	0	43	42	2	4	0	0	0	2	0	0	2	38	0	0
RUNX2	RUNX2_HUMAN.H11MO.0.A	Runt-related factors{6.4.1}	Runx2 (PEBP2alphaA, CBF-alpha1){6.4.1.0.1}	14	49	52	2	4	12	0	12	2	0	14	0	49	0	0
RUNX3	RUNX3_HUMAN.H11MO.0.A	Runt-related factors{6.4.1}	Runx3 (PEBP2alphaC, CBF-alpha3, AML-2){6.4.1.0.3}	8	50	50	2	3	7	1	4	2	0	8	2	45	0	0
RXRA	RXRA_HUMAN.H11MO.0.A	RXR-related receptors (NR2){2.1.3}	Retinoid X receptors (NR2B){2.1.3.1}	26	40	49	0	6	24	0	28	0	3	25	3	40	0	0
RXRB	RXRB_HUMAN.H11MO.0.C	RXR-related receptors (NR2){2.1.3}	Retinoid X receptors (NR2B){2.1.3.1}	0	33	33	3	5	0	0	0	1	1	0	0	25	0	0
RXRG	RXRG_HUMAN.H11MO.0.B	RXR-related receptors (NR2){2.1.3}	Retinoid X receptors (NR2B){2.1.3.1}	2	46	47	0	1	2	0	1	0	0	2	0	44	0	0
SALL4	SALL4_HUMAN.H11MO.0.B	Factors with multiple dispersed zinc fingers{2.3.4}	Sal-like factors{2.3.4.3}	1	24	24	3	9	1	0	0	1	5	1	4	20	0	0
SIX1	SIX1_HUMAN.H11MO.0.A	HD-SINE factors{3.1.6}	SIX1-like factors{3.1.6.1}	12	44	57	0	0	7	0	7	0	0	11	0	45	0	0
SIX2	SIX2_HUMAN.H11MO.0.A	HD-SINE factors{3.1.6}	SIX1-like factors{3.1.6.1}	12	47	56	0	0	12	0	9	0	0	12	0	50	0	0
SMAD2	SMAD2_HUMAN.H11MO.0.A	SMAD factors{7.1.1}	Regulatory Smads (R-Smad){7.1.1.1}	1	48	50	1	5	1	0	1	0	1	1	1	43	0	0
SMAD3	SMAD3_HUMAN.H11MO.0.B	SMAD factors{7.1.1}	Regulatory Smads (R-Smad){7.1.1.1}	9	42	46	0	1	5	0	1	0	1	7	1	34	0	0
SMAD4	SMAD4_HUMAN.H11MO.0.B	SMAD factors{7.1.1}	Co-activating Smads (Co-Smad){7.1.1.2}	2	40	41	0	3	2	0	2	0	1	2	1	36	0	0
SMARCA1	SMCA1_HUMAN.H11MO.0.C	Myb/SANT domain factors{3.5.1}	SMARCA-like factors{3.5.1.5}	4	32	35	0	1	4	0	1	0	0	4	0	31	0	0
SMARCA5	SMCA5_HUMAN.H11MO.0.C	Myb/SANT domain factors{3.5.1}	SMARCA-like factors{3.5.1.5}	13	44	50	0	1	12	0	11	0	0	12	0	45	0	0
SNAI2	SNAI2_HUMAN.H11MO.0.A	More than 3 adjacent zinc finger factors{2.3.3}	Snail-like factors{2.3.3.2}	7	34	40	0	0	3	0	3	0	0	4	0	25	0	0
SOX10	SOX10_HUMAN.H11MO.0.B	SOX-related factors{4.1.1}	Group E{4.1.1.5}	17	46	59	1	2	12	0	20	1	0	15	1	50	0	0
SOX17	SOX17_HUMAN.H11MO.0.C	SOX-related factors{4.1.1}	Group F{4.1.1.6}	11	40	44	0	1	7	0	5	0	0	9	0	32	0	0
SOX2	SOX2_HUMAN.H11MO.0.A	SOX-related factors{4.1.1}	Group B{4.1.1.2}	4	27	28	0	2	3	0	1	0	0	3	1	24	0	0
SOX3	SOX3_HUMAN.H11MO.0.B	SOX-related factors{4.1.1}	Group B{4.1.1.2}	3	32	34	0	5	1	0	3	0	0	2	0	30	0	0
SOX4	SOX4_HUMAN.H11MO.0.B	SOX-related factors{4.1.1}	Group C{4.1.1.3}	3	22	22	0	4	2	0	1	0	1	3	1	19	0	0
SOX5	SOX5_HUMAN.H11MO.0.C	SOX-related factors{4.1.1}	Group D{4.1.1.4}	7	22	25	0	1	4	0	5	0	0	6	0	18	0	0
SOX9	SOX9_HUMAN.H11MO.0.B	SOX-related factors{4.1.1}	Group E{4.1.1.5}	14	42	49	0	5	9	0	22	0	2	13	3	40	0	0
SP1	SP1_HUMAN.H11MO.0.A	Three-zinc finger Krüppel-related factors{2.3.1}	Sp1-like factors{2.3.1.1}	3	21	23	7	8	3	2	4	5	4	3	5	21	3	0
SP2	SP2_HUMAN.H11MO.0.A	Three-zinc finger Krüppel-related factors{2.3.1}	Sp1-like factors{2.3.1.1}	5	22	20	5	11	5	0	6	2	3	5	5	20	0	0
SP3	SP3_HUMAN.H11MO.0.B	Three-zinc finger Krüppel-related factors{2.3.1}	Sp1-like factors{2.3.1.1}	2	25	24	5	11	2	0	2	3	5	2	6	24	0	0
SP4	SP4_HUMAN.H11MO.0.A	Three-zinc finger Krüppel-related factors{2.3.1}	Sp1-like factors{2.3.1.1}	7	24	25	2	9	7	1	8	1	6	7	6	25	0	0
SPI1	SPI1_HUMAN.H11MO.0.A	Ets-related factors{3.5.2}	Spi-like factors{3.5.2.5}	17	50	53	1	2	14	0	13	0	0	15	0	50	0	0
SPIB	SPIB_HUMAN.H11MO.0.A	Ets-related factors{3.5.2}	Spi-like factors{3.5.2.5}	15	51	54	1	2	13	0	11	0	0	14	0	51	0	0
SREBF1	SRBP1_HUMAN.H11MO.0.A	bHLH-ZIP factors{1.2.6}	SREBP factors{1.2.6.3}	4	31	33	0	4	3	0	2	0	2	3	0	27	0	0
SREBF2	SRBP2_HUMAN.H11MO.0.B	bHLH-ZIP factors{1.2.6}	SREBP factors{1.2.6.3}	4	35	37	1	5	2	0	2	1	4	3	4	32	0	0
SRF	SRF_HUMAN.H11MO.0.A	Responders to external signals (SRF/RLM1){5.1.2}	SRF{5.1.2.0.1}	13	53	63	1	6	10	0	13	1	2	13	0	58	0	0
SRY	SRY_HUMAN.H11MO.0.B	SOX-related factors{4.1.1}	Group A{4.1.1.1}	7	22	25	3	10	4	0	4	1	0	6	0	17	0	0
STAT5A	STA5A_HUMAN.H11MO.0.A	STAT factors{6.2.1}	STAT5A{6.2.1.0.5}	2	36	37	2	3	0	0	1	2	2	1	2	30	0	0
STAT5B	STA5B_HUMAN.H11MO.0.A	STAT factors{6.2.1}	STAT5B{6.2.1.0.6}	1	47	48	0	3	0	0	1	0	0	1	0	42	0	0
STAT1	STAT1_HUMAN.H11MO.0.A	STAT factors{6.2.1}	STAT1{6.2.1.0.1}	10	54	61	1	2	8	0	12	1	0	9	0	59	0	0
STAT2	STAT2_HUMAN.H11MO.0.A	STAT factors{6.2.1}	STAT2{6.2.1.0.2}	16	14	19	0	3	14	0	15	0	1	16	1	12	0	0
STAT3	STAT3_HUMAN.H11MO.0.A	STAT factors{6.2.1}	STAT3{6.2.1.0.3}	2	43	43	6	7	1	0	0	6	0	1	0	39	0	0
STAT4	STAT4_HUMAN.H11MO.0.A	STAT factors{6.2.1}	STAT4{6.2.1.0.4}	6	49	51	2	2	4	0	5	1	1	5	3	42	0	0
STAT6	STAT6_HUMAN.H11MO.0.B	STAT factors{6.2.1}	STAT6{6.2.1.0.7}	2	42	43	0	2	1	0	1	0	0	2	1	39	0	0
NR5A1	STF1_HUMAN.H11MO.0.B	FTZ-F1-related receptors (NR5){2.1.5}	FTZ-F1 (SF-1) (NR5A1){2.1.5.0.1}	2	47	48	0	1	2	0	0	0	0	2	0	41	0	0
RBPJ	SUH_HUMAN.H11MO.0.A	CSL-related factors{6.1.4}	M{6.1.4.1}	6	45	47	4	5	4	0	1	4	1	6	1	42	0	0
TAF1	TAF1_HUMAN.H11MO.0.A	TCF-7-related factors{4.1.3}	TAF-1 (TAF-2A, TAF(II)250) [1]{4.1.3.0.5}	20	26	28	1	11	18	0	20	0	6	18	5	25	0	0
TAL1	TAL1_HUMAN.H11MO.0.A	Tal-related factors{1.2.3}	Tal / HEN-like factors{1.2.3.1}	24	60	75	3	9	16	0	38	3	3	21	1	64	1	0
TBP	TBP_HUMAN.H11MO.0.A	TBP-related factors{8.1.1}	TBP{8.1.1.0.1}	8	28	31	0	1	6	0	6	0	0	7	0	22	0	0
TBX21	TBX21_HUMAN.H11MO.0.A	TBrain-related factors{6.5.2}	TBX21 (T-bet){6.5.2.0.3}	8	49	51	1	4	7	0	3	0	1	8	3	46	0	0
TBX3	TBX3_HUMAN.H11MO.0.C	TBX2-related factors{6.5.4}	TBX3{6.5.4.0.2}	4	30	33	3	5	3	0	0	0	0	4	0	25	0	0
TCF7	TCF7_HUMAN.H11MO.0.A	TCF-7-related factors{4.1.3}	TCF-7 (TCF-1) [1]{4.1.3.0.1}	14	45	50	0	2	10	0	15	0	1	13	1	47	0	0
TEAD1	TEAD1_HUMAN.H11MO.0.A	TEF-1-related factors{3.6.1}	TEF-1 (TEAD-1, TCF-13){3.6.1.0.1}	1	33	35	0	2	1	0	0	0	0	1	1	32	0	0
TEAD4	TEAD4_HUMAN.H11MO.0.A	TEF-1-related factors{3.6.1}	TEF-3 (TEAD-4, TCF-13L1){3.6.1.0.2}	5	46	50	0	2	5	0	2	0	0	5	1	43	0	0
RELA	TF65_HUMAN.H11MO.0.A	NF-kappaB-related factors{6.1.1}	NF-kappaB p65 subunit-like factors{6.1.1.2}	4	28	31	0	2	2	0	3	0	0	3	0	29	0	0
TCF7L1	TF7L1_HUMAN.H11MO.0.B	TCF-7-related factors{4.1.3}	TCF-7L1 (TCF-3) [1]{4.1.3.0.2}	14	49	55	2	4	12	0	11	2	0	14	1	52	0	0
TCF7L2	TF7L2_HUMAN.H11MO.0.A	TCF-7-related factors{4.1.3}	TCF-7L2 (TCF-4) [1]{4.1.3.0.3}	11	55	61	0	3	9	0	6	0	0	10	0	56	0	0
TFAP4	TFAP4_HUMAN.H11MO.0.A	bHLH-ZIP factors{1.2.6}	AP-4{1.2.6.4}	0	40	40	2	2	0	0	0	2	2	0	1	39	0	0
TFDP1	TFDP1_HUMAN.H11MO.0.C	E2F-related factors{3.3.2}	Dp-1{3.3.2.2}	2	27	27	4	9	2	0	2	4	4	2	4	27	0	0
TCF3	TFE2_HUMAN.H11MO.0.A	E2A-related factors{1.2.1}	E2A (TCF-3, ITF-1){1.2.1.0.1}	1	26	26	0	0	1	0	0	0	0	1	0	22	0	0
TFE3	TFE3_HUMAN.H11MO.0.B	bHLH-ZIP factors{1.2.6}	TFE3-like factors{1.2.6.1}	1	39	40	5	5	1	0	0	5	1	1	1	31	0	0
TFEB	TFEB_HUMAN.H11MO.0.C	bHLH-ZIP factors{1.2.6}	TFE3-like factors{1.2.6.1}	3	30	29	7	8	3	0	2	3	1	3	1	18	0	0
THRA	THA_HUMAN.H11MO.0.C	Thyroid hormone receptor-related factors (NR1){2.1.2}	Thyroid hormone receptors (NR1A){2.1.2.2}	24	50	57	4	7	18	0	22	4	3	21	3	47	0	0
THAP11	THA11_HUMAN.H11MO.0.B	THAP-related factors{2.9.1}	THAP11 (HRIHFB2206){2.9.1.0.11}	33	37	63	5	8	26	3	38	5	5	31	5	50	2	0
THAP1	THAP1_HUMAN.H11MO.0.C	THAP-related factors{2.9.1}	THAP1{2.9.1.0.1}	21	30	36	0	13	20	0	27	0	10	21	7	33	0	1
THRB	THB_HUMAN.H11MO.0.C	Thyroid hormone receptor-related factors (NR1){2.1.2}	Thyroid hormone receptors (NR1A){2.1.2.2}	12	48	51	1	5	11	0	18	0	2	12	2	42	0	0
TWIST1	TWST1_HUMAN.H11MO.0.A	Tal-related factors{1.2.3}	Twist-like factors{1.2.3.2}	17	47	56	0	1	17	0	25	0	0	17	0	47	0	0
YY1	TYY1_HUMAN.H11MO.0.A	More than 3 adjacent zinc finger factors{2.3.3}	YY1-like factors{2.3.3.9}	3	51	50	2	3	1	0	3	1	0	3	0	46	0	0
USF1	USF1_HUMAN.H11MO.0.A	bHLH-ZIP factors{1.2.6}	USF factors{1.2.6.2}	0	36	36	2	8	0	0	0	1	1	0	0	34	0	0
USF2	USF2_HUMAN.H11MO.0.A	bHLH-ZIP factors{1.2.6}	USF factors{1.2.6.2}	20	44	48	0	6	19	0	27	0	2	20	3	44	0	0
VDR	VDR_HUMAN.H11MO.0.A	Thyroid hormone receptor-related factors (NR1){2.1.2}	Vitamin D receptor (NR1I){2.1.2.4}	12	29	38	0	1	12	0	16	0	0	12	2	34	0	0
VEZF1	VEZF1_HUMAN.H11MO.0.C	Factors with multiple dispersed zinc fingers{2.3.4}	MAZ-like factors{2.3.4.8}	18	23	25	0	5	17	0	18	0	4	17	7	21	0	1
WT1	WT1_HUMAN.H11MO.0.C	More than 3 adjacent zinc finger factors{2.3.3}	unclassified{2.3.3.0}	16	27	27	1	9	15	0	16	1	6	16	8	26	1	0
ZNF324	Z324A_HUMAN.H11MO.0.C	More than 3 adjacent zinc finger factors{2.3.3}	ZNF324 factors{2.3.3.36}	25	43	63	0	4	19	0	30	0	3	25	4	50	0	0
ZNF354A	Z354A_HUMAN.H11MO.0.C	More than 3 adjacent zinc finger factors{2.3.3}	ZNF354A-like factors{2.3.3.64}	19	16	31	0	1	15	0	17	0	0	17	0	19	0	0
ZBTB14	ZBT14_HUMAN.H11MO.0.C	More than 3 adjacent zinc finger factors{2.3.3}	unclassified{2.3.3.0}	3	33	33	0	3	3	0	3	0	1	3	0	33	0	0
ZBTB17	ZBT17_HUMAN.H11MO.0.A	Factors with multiple dispersed zinc fingers{2.3.4}	unclassified{2.3.4.0}	16	21	25	3	8	15	0	16	1	4	16	6	23	0	0
ZBTB18	ZBT18_HUMAN.H11MO.0.C	More than 3 adjacent zinc finger factors{2.3.3}	ZNF238-like factors{2.3.3.16}	2	36	36	0	0	2	0	2	0	0	2	0	34	0	0
ZBTB48	ZBT48_HUMAN.H11MO.0.C	More than 3 adjacent zinc finger factors{2.3.3}	unclassified{2.3.3.0}	3	57	58	0	4	2	0	1	0	2	2	2	51	0	0
ZBTB7A	ZBT7A_HUMAN.H11MO.0.A	More than 3 adjacent zinc finger factors{2.3.3}	ZBTB7 factors{2.3.3.8}	6	22	23	2	7	6	0	5	0	4	6	2	19	0	0
ZBTB6	ZBTB6_HUMAN.H11MO.0.C	More than 3 adjacent zinc finger factors{2.3.3}	ZBTB6-like factors{2.3.3.11}	6	31	32	0	3	5	0	5	0	1	5	1	27	0	0
ZEB1	ZEB1_HUMAN.H11MO.0.A	HD-ZF factors{3.1.8}	ZEB{3.1.8.3}	5	35	39	0	0	5	0	0	0	0	5	0	32	0	0
ZFP28	ZFP28_HUMAN.H11MO.0.C	More than 3 adjacent zinc finger factors{2.3.3}	unclassified{2.3.3.0}	17	18	32	0	1	9	0	15	0	0	16	1	19	0	0
ZFP42	ZFP42_HUMAN.H11MO.0.A	More than 3 adjacent zinc finger factors{2.3.3}	YY1-like factors{2.3.3.9}	10	56	59	1	4	4	0	3	1	0	7	0	54	0	0
ZFP82	ZFP82_HUMAN.H11MO.0.C	More than 3 adjacent zinc finger factors{2.3.3}	ZFP30-like factors{2.3.3.63}	20	23	36	0	3	17	0	24	0	0	19	0	27	0	0
ZFX	ZFX_HUMAN.H11MO.0.A	More than 3 adjacent zinc finger factors{2.3.3}	ZFX/ZFY factors{2.3.3.65}	0	35	35	1	4	0	0	0	0	0	0	3	30	0	0
ZIC1	ZIC1_HUMAN.H11MO.0.B	More than 3 adjacent zinc finger factors{2.3.3}	GLI-like factors{2.3.3.1}	5	24	24	1	6	5	0	5	0	4	5	4	19	0	0
ZIC3	ZIC3_HUMAN.H11MO.0.B	More than 3 adjacent zinc finger factors{2.3.3}	GLI-like factors{2.3.3.1}	7	62	65	0	0	7	0	11	0	0	7	0	63	0	0
ZIM3	ZIM3_HUMAN.H11MO.0.C	More than 3 adjacent zinc finger factors{2.3.3}	unclassified{2.3.3.0}	35	42	57	0	2	28	0	32	0	0	34	1	49	0	0
ZKSCAN1	ZKSC1_HUMAN.H11MO.0.B	More than 3 adjacent zinc finger factors{2.3.3}	ZNF24-like factors{2.3.3.10}	22	57	68	0	3	18	0	26	0	1	22	1	60	0	0
ZNF121	ZN121_HUMAN.H11MO.0.C	More than 3 adjacent zinc finger factors{2.3.3}	unclassified{2.3.3.0}	10	22	36	4	6	1	0	1	1	1	3	1	12	0	0
ZNF134	ZN134_HUMAN.H11MO.0.C	Factors with multiple dispersed zinc fingers{2.3.4}	ZNF134-like factors{2.3.4.24}	27	45	58	0	4	20	0	35	0	3	25	1	47	0	0
ZNF136	ZN136_HUMAN.H11MO.0.C	More than 3 adjacent zinc finger factors{2.3.3}	ZNF763-like factors{2.3.3.33}	34	32	62	0	3	26	0	40	0	0	33	0	40	0	0
ZNF140	ZN140_HUMAN.H11MO.0.C	More than 3 adjacent zinc finger factors{2.3.3}	ZNF302-like factors{2.3.3.44}	30	47	65	0	3	24	0	34	0	1	28	0	53	0	0
ZNF143	ZN143_HUMAN.H11MO.0.A	More than 3 adjacent zinc finger factors{2.3.3}	ZNF76-like factors{2.3.3.28}	27	33	52	4	5	22	1	31	4	4	26	1	36	4	0
ZNF214	ZN214_HUMAN.H11MO.0.C	More than 3 adjacent zinc finger factors{2.3.3}	ZNF214-like factors{2.3.3.56}	36	54	70	0	2	30	0	50	0	0	34	0	56	0	0
ZNF250	ZN250_HUMAN.H11MO.0.C	More than 3 adjacent zinc finger factors{2.3.3}	unclassified{2.3.3.0}	26	47	55	3	6	23	0	30	3	0	25	0	48	0	0
ZNF257	ZN257_HUMAN.H11MO.0.C	More than 3 adjacent zinc finger factors{2.3.3}	unclassified{2.3.3.0}	4	45	46	0	3	2	0	2	0	0	2	0	39	0	0
ZNF260	ZN260_HUMAN.H11MO.0.C	More than 3 adjacent zinc finger factors{2.3.3}	ZNF146-like factors{2.3.3.55}	26	31	45	0	2	21	0	30	0	0	25	0	32	0	0
ZNF263	ZN263_HUMAN.H11MO.0.A	More than 3 adjacent zinc finger factors{2.3.3}	unclassified{2.3.3.0}	19	24	31	0	8	19	0	21	0	6	19	8	27	0	1
ZNF264	ZN264_HUMAN.H11MO.0.C	More than 3 adjacent zinc finger factors{2.3.3}	ZNF460-like factors{2.3.3.54}	44	48	77	1	3	37	0	49	1	1	43	0	60	0	0
ZNF274	ZN274_HUMAN.H11MO.0.A	More than 3 adjacent zinc finger factors{2.3.3}	unclassified{2.3.3.0}	26	50	71	0	2	19	0	31	0	0	24	0	58	0	0
ZNF281	ZN281_HUMAN.H11MO.0.A	More than 3 adjacent zinc finger factors{2.3.3}	ZNF148-like factors{2.3.3.13}	10	26	26	2	6	9	1	8	1	4	10	6	24	1	2
ZNF317	ZN317_HUMAN.H11MO.0.C	More than 3 adjacent zinc finger factors{2.3.3}	unclassified{2.3.3.0}	36	47	61	2	5	34	0	41	2	1	36	0	56	0	0
ZNF320	ZN320_HUMAN.H11MO.0.C	More than 3 adjacent zinc finger factors{2.3.3}	unclassified{2.3.3.0}	21	29	40	0	4	15	0	20	0	3	18	3	32	0	0
ZNF322	ZN322_HUMAN.H11MO.0.B	More than 3 adjacent zinc finger factors{2.3.3}	ZNF322-like factors{2.3.3.52}	33	49	56	1	5	31	0	36	1	2	31	4	50	0	0
ZNF329	ZN329_HUMAN.H11MO.0.C	More than 3 adjacent zinc finger factors{2.3.3}	unclassified{2.3.3.0}	50	49	72	2	6	41	0	52	2	3	49	3	62	0	0
ZNF331	ZN331_HUMAN.H11MO.0.C	More than 3 adjacent zinc finger factors{2.3.3}	unclassified{2.3.3.0}	19	50	61	0	4	17	0	20	0	3	18	3	59	0	0
ZNF335	ZN335_HUMAN.H11MO.0.A	Factors with multiple dispersed zinc fingers{2.3.4}	unclassified{2.3.4.0}	43	60	78	0	5	37	0	60	0	4	41	5	66	0	0
ZNF341	ZN341_HUMAN.H11MO.0.C	Factors with multiple dispersed zinc fingers{2.3.4}	unclassified{2.3.4.0}	23	32	37	2	13	20	0	24	0	6	21	8	31	0	0
ZNF350	ZN350_HUMAN.H11MO.0.C	More than 3 adjacent zinc finger factors{2.3.3}	ZNF350-like factors{2.3.3.30}	21	35	44	0	3	14	0	18	0	0	19	1	35	0	0
ZNF382	ZN382_HUMAN.H11MO.0.C	Factors with multiple dispersed zinc fingers{2.3.4}	ZNF37A-like factors{2.3.4.25}	35	59	75	1	5	30	0	42	1	0	34	2	67	0	0
ZNF384	ZN384_HUMAN.H11MO.0.C	More than 3 adjacent zinc finger factors{2.3.3}	ZNF362-like factors{2.3.3.37}	2	26	27	0	2	2	0	3	0	0	2	0	21	0	0
ZNF394	ZN394_HUMAN.H11MO.0.C	More than 3 adjacent zinc finger factors{2.3.3}	unclassified{2.3.3.0}	17	24	34	0	1	17	0	16	0	0	17	1	25	0	0
ZNF418	ZN418_HUMAN.H11MO.0.C	Factors with multiple dispersed zinc fingers{2.3.4}	ZNF417-like factors{2.3.4.1}	24	48	55	0	1	19	0	29	0	0	23	0	52	0	0
ZNF436	ZN436_HUMAN.H11MO.0.C	More than 3 adjacent zinc finger factors{2.3.3}	ZNF180-like factors{2.3.3.58}	33	50	72	2	7	25	0	50	1	3	33	3	60	0	0
ZNF449	ZN449_HUMAN.H11MO.0.C	More than 3 adjacent zinc finger factors{2.3.3}	unclassified{2.3.3.0}	2	22	22	1	4	2	0	1	0	2	2	2	18	0	0
ZNF467	ZN467_HUMAN.H11MO.0.C	Factors with multiple dispersed zinc fingers{2.3.4}	unclassified{2.3.4.0}	21	22	27	0	7	19	0	22	0	5	19	5	24	0	1
ZNF490	ZN490_HUMAN.H11MO.0.C	More than 3 adjacent zinc finger factors{2.3.3}	ZNF763-like factors{2.3.3.33}	28	43	65	0	2	13	0	38	0	0	24	0	49	0	0
ZNF502	ZN502_HUMAN.H11MO.0.C	More than 3 adjacent zinc finger factors{2.3.3}	unclassified{2.3.3.0}	16	36	50	0	2	16	0	20	0	0	16	0	45	0	0
ZNF528	ZN528_HUMAN.H11MO.0.C	More than 3 adjacent zinc finger factors{2.3.3}	unclassified{2.3.3.0}	25	42	54	0	3	21	0	27	0	1	23	1	44	0	0
ZNF547	ZN547_HUMAN.H11MO.0.C	More than 3 adjacent zinc finger factors{2.3.3}	unclassified{2.3.3.0}	27	61	68	0	2	23	0	34	0	1	27	1	62	0	0
ZNF549	ZN549_HUMAN.H11MO.0.C	More than 3 adjacent zinc finger factors{2.3.3}	unclassified{2.3.3.0}	31	63	80	0	4	28	0	43	0	0	30	1	73	0	0
ZNF554	ZN554_HUMAN.H11MO.0.C	More than 3 adjacent zinc finger factors{2.3.3}	unclassified{2.3.3.0}	21	36	55	0	4	13	0	23	0	3	18	3	33	0	0
ZNF563	ZN563_HUMAN.H11MO.0.C	More than 3 adjacent zinc finger factors{2.3.3}	ZNF763-like factors{2.3.3.33}	24	53	73	0	2	16	0	35	0	2	24	1	64	0	0
ZNF582	ZN582_HUMAN.H11MO.0.C	More than 3 adjacent zinc finger factors{2.3.3}	ZNF620-like factors{2.3.3.35}	37	64	81	0	3	33	0	50	0	1	36	0	70	0	0
ZNF586	ZN586_HUMAN.H11MO.0.C	More than 3 adjacent zinc finger factors{2.3.3}	unclassified{2.3.3.0}	24	45	52	0	2	22	0	22	0	0	23	1	43	0	0
ZNF667	ZN667_HUMAN.H11MO.0.C	More than 3 adjacent zinc finger factors{2.3.3}	unclassified{2.3.3.0}	28	52	62	2	7	24	0	32	2	4	27	2	57	0	0
ZNF680	ZN680_HUMAN.H11MO.0.C	More than 3 adjacent zinc finger factors{2.3.3}	unclassified{2.3.3.0}	22	50	59	0	2	18	0	27	0	0	21	0	52	0	0
ZNF708	ZN708_HUMAN.H11MO.0.C	More than 3 adjacent zinc finger factors{2.3.3}	unclassified{2.3.3.0}	51	62	82	1	6	42	0	52	1	2	47	2	73	0	0
ZNF768	ZN768_HUMAN.H11MO.0.C	More than 3 adjacent zinc finger factors{2.3.3}	unclassified{2.3.3.0}	23	44	57	0	2	21	0	27	0	0	23	1	52	0	0
ZNF770	ZN770_HUMAN.H11MO.0.C	Factors with multiple dispersed zinc fingers{2.3.4}	unclassified{2.3.4.0}	11	17	24	3	6	2	0	4	0	0	4	0	4	0	0
ZNF816	ZN816_HUMAN.H11MO.0.C	More than 3 adjacent zinc finger factors{2.3.3}	ZNF816A-like factors{2.3.3.73}	33	39	55	0	8	29	0	37	0	3	33	4	47	0	0
ZNF18	ZNF18_HUMAN.H11MO.0.C	More than 3 adjacent zinc finger factors{2.3.3}	unclassified{2.3.3.0}	13	45	51	0	2	9	0	11	0	0	11	0	46	0	0
ZNF41	ZNF41_HUMAN.H11MO.0.C	More than 3 adjacent zinc finger factors{2.3.3}	ZFN81-like factors{2.3.3.68}	37	43	63	0	4	33	0	39	0	0	36	3	50	0	0
ZNF76	ZNF76_HUMAN.H11MO.0.C	More than 3 adjacent zinc finger factors{2.3.3}	ZNF76-like factors{2.3.3.28}	14	38	42	4	8	11	3	21	4	6	14	7	33	3	0
ZNF8	ZNF8_HUMAN.H11MO.0.C	Factors with multiple dispersed zinc fingers{2.3.4}	unclassified{2.3.4.0}	40	40	64	0	2	30	0	46	0	0	39	0	50	0	0
ZNF85	ZNF85_HUMAN.H11MO.0.C	More than 3 adjacent zinc finger factors{2.3.3}	unclassified{2.3.3.0}	27	36	56	0	2	19	0	33	0	0	25	0	48	0	0
ZSCAN22	ZSC22_HUMAN.H11MO.0.C	More than 3 adjacent zinc finger factors{2.3.3}	unclassified{2.3.3.0}	9	25	26	0	4	7	0	10	0	3	8	4	23	0	0
ZSCAN31	ZSC31_HUMAN.H11MO.0.C	More than 3 adjacent zinc finger factors{2.3.3}	ZNF24-like factors{2.3.3.10}	12	51	58	1	2	9	0	13	1	0	10	0	56	0	0
